# Supplementary material
Source: PubMed Central journal article supplement (PMC4463203)

TERT or IgG as indicated. For the western blots, representative images of n=3 independent experiments are shown. Student's t-test was used, and \* indicates  $p < 0.05$  and # indicates a non-significant p-value, compared to sh/siControl.

**Figure 6: TERT regulates MYC half-life and ubiquitination.**

(A) and (B) Western blots showing MYC levels upon TERT or *Terc* knockdown following cycloheximide treatment (CHX) for indicated time points in P493 cells and E $\mu$ MYC B cells. (C) and (D) Western blots in P493 and EmMYC B cells showing the levels of MYC, TERT and ACTIN upon TERT knockdown, with and without MG132 treatment (10  $\mu$ M, 2 h). (E) Western blots showing levels of indicated proteins upon vector, TERT WT and TERT DN expression. (F) Coimmunoprecipitation between endogenous MYC and GSK3 $\beta$  in cells infected with shRNA against control (-) or TERT(+) and immunoblotting with indicated antibodies. (G) 293T cells were transfected with HA-MYC, His-ubiquitin along with shControl or shTERT 1. 48h post transfection cells were harvested, immunoprecipitated with Ni-NTA beads, and western blotted with HA. Right panel shows the inputs. (H) In vivo MYC ubiquitination assay in cells transfected with control (-) or TERT (+) shRNAs along with HA-Ub. Immunoprecipitation and immunoblots from lysates or immunoprecipitated material were performed by using indicated antibodies. For the western blots, representative images of n=3 independent experiments are shown.

**Figure 7: Graphical model.** TERT levels, which are limiting in reconstituting telomerase activity in normal cells, are upregulated by increased MYC in cancer cells. TERT, in turn, enhances MYC stability and function, thereby regulating its own levels and telomerase activity. This function of TERT does not require *Terc*, and is independent of its function at telomeres. Enhanced MYC stability and function in high TERT and high MYC cells, which is a consequence of this feed forward mechanism, leads to enhanced oncogenesis due to downstream targets of MYC, which are known to regulate aspects of cell cycle, proliferation and metabolism.

**Supplementary Figure 1:** (A) Western blot of MYC and TERT in B-cells from E $\mu$ MYC mice (n=4) compared to wildtype mice (n=4). (B) Viability of E $\mu$ MYC B-cells following TERT knockdown using 2 independent shRNAs, which could be partially rescued by the overexpression of human TERT. (C)

Viability of wildtype and E $\mu$ MYC B-cells following TERT knockdown. (D) TERT protein levels, as shown by Western blot (top), in primary lymphoma cells from E $\mu$ MYC mice after silencing *Terc* (sh-*Terc*) (bottom). Values denote mean $\pm$ s.d., n=2. (E) Teloblot showing the length of telomeres in primary lymphoma cells from E $\mu$ MYC mice after silencing *Terc* (sh*Terc*) or TERT (shTERT). One way ANOVA with Tukey's Multiple Comparison Test was used for (B and C) and students t-test was used for (D) \* indicates p<0.05 vs. shControl, \*\* indicates p<0.01 vs. shControl, ^ indicates non-significant p-value vs. shControl and ### indicates p<0.01 vs. shTERT-A or shTERT-B. For the western blots, representative images of n=3 independent experiments are shown.

**Supplementary Figure 2:** (A) Teloblot showing of telomere lengths in tumors from E $\mu$ MYC;TERT+/+ and E $\mu$ MYC;TERT-/- mice (n=2 for each genotype). (B) Immunofluorescence staining for TRF2 (green) and  $\gamma$ H2AX (red) in E $\mu$ MYC;TERT+/+, and E $\mu$ MYC;TERT-/- B cells. The cell nuclei were counterstained with DAPI (blue). We did not observe any DNA damage foci ( $\gamma$ H2AX staining) at telomeric regions. As B cells are small and round, the staining is less distinct. Representative images are shown, and cells isolated from 2 mice of each genotype were analyzed (60x magnification).

**Supplementary Figure 3:** (A) ChIP-seq binding profiles at selected promoters in P493 cells (B) and E $\mu$ MYC;TERT+/+ and E $\mu$ MYC;TERT-/- B cells. (C, D) Validation of selected ChIP seq targets in P493 cells with additional shRNA constructs. These changes could be rescued by the overexpression of TERT WT or TERT DN. (E) Validation of selected ChIP seq targets in B cells isolated from 4-week old, pretumoral E $\mu$ MYC;TERT+/+ and E $\mu$ MYC;TERT-/- mice (n=3 for each genotype) using antibodies for MYC and Pol-II. The B-cells from E $\mu$ MYC;TERT-/- showed lower enrichment of MYC and Pol-II at the promoters of selected MYC-regulated genes. (F) NF-Y ChIP was carried out in P493 cells infected with shControl and shTERT. Graphs show % Input for indicated target promoters. (G) Heatmap showing the validation of the expression of selected Myc-target genes in 12-week-old E $\mu$ MYC;TERT+/+, E $\mu$ MYC;TERT+/- and E $\mu$ MYC;TERT-/- spleen B cells. (H-I) Validation of selected gene expression changes in P493 cells with indicated infections. X axis labels indicate rRNA target genes and rDNA regions respectively. (J) Validation of selected gene expression changes in E $\mu$ MYC B cells. Values denote mean $\pm$ s.d., n=3. One way ANOVA with Tukey's Multiple Comparison Test was used for (C, D, H, I and J) and students t-test was used for (E) and (F) \* indicates p<0.05 vs. shControl, \*\* indicates p<0.01 vs. shControl, ^ indicates a non-significant p-value vs. shControl, # indicates p<0.05 vs. shTERT3 (for C, D, H, I) or shTERT-A or shTERT-B (for J), ### indicates p<0.01 vs. shTERT3 (for C, D, H, I) or shTERT-A or shTERT-B (for J).

shTERT-A or shTERT-B (for J) and @ indicates a non-significant p-value vs. shTERT3 (for C, D, H, I) or shTERT-A or shTERT-B (for J).

**Supplementary Figure 4:** (A-B) Gene expression analysis in P493 cells with knockdown of TERT and *Terc* under high MYC (cells grown in no tetracycline, no estradiol) and low MYC conditions [cells grown with tetracycline (0.1  $\mu\text{g/ml}$ ) and  $\beta$ -estradiol (1  $\mu\text{M}$ )]. Values denote mean $\pm$ s.d., n=3. Students t-test was used and \* indicates  $p < 0.05$ .

**Supplementary Figure 5:** (A) VA13 cells were transfected with the indicated expression vectors. 48 h post transfection, the samples were harvested and processed for quantitative RT-PCR. The graph shows relative TERT expression. ACTIN was used as the reference gene. (Left panel). VA13 cells were transfected with the indicated expression vectors. 48 h post transfection, the samples were harvested and processed for western blotting of MYC and ACTIN (right panel). (B) MYC was immunoprecipitated from MIHA cells and the eluates were western blotted for indicated proteins. (C) Co-Immunoprecipitation between endogenous MYC and TERT in the P493 cells with shControl, shTERT 2 or sh*Terc*. (D) Schematic showing the various domains of MYC. (E) 293T cells were transfected with FLAG-tagged human wild-type or MYC mutants deleted in amino acid residues 1-110, 129-145, 20-48, 24-31, 33-38 and 38-48, or vector control. Bottom Panel shows western blots indicating input proteins and top panel shows western blot analysis of indicated lysates immunoprecipitated with Flag or TERT antibody. Red asterisk indicates no interaction. (F) Left panel: Bacterially expressed GST, pGex2T-MYC (1-108 aa) or pGex3X-MYC (98-439 aa) proteins were incubated with whole cell lysates from HeLa with control or TERT overexpression. Following incubation, the mixture was immunoprecipitated with GST antibody and immunoblotted (IB) with TERT. Right Panel: Coomassie Blue staining of Purified MYC proteins (1-108 aa) and (98-439 aa) along with GST expressed from a control vector (GST). (G) 293T cells were transfected with indicated proteins and checked for gene expression. (H) 293T cells were transfected with FLAG-tagged human wild-type, dominant negative or TERT mutants deleted in amino acid residues 1-600, 101-1127, 1-925, 350-925 or Flag vector control. The bottom panel shows western blots indicating input proteins and top panel shows western blot analysis of indicated lysates immunoprecipitated with Flag antibody. For the western blots, representative images of n=3 independent experiments are shown. One way ANOVA with Tukey's Multiple Comparison Test was used, and \* indicates  $p < 0.05$  vs. Vector, \*\* indicates  $p < 0.01$  vs. Vector, ^ indicates a non-significant p-value vs. Vector.

**Supplementary Figure 6:** (A) Western blots showing MYC levels following cycloheximide treatment (CHX) for the indicated time points in P493 cells infected with shControl, shTERT 2 and 3. (B) Western blots showing MYC levels upon cycloheximide treatment (CHX) for indicated time points in 293T cells transfected with Flag-MYC T58A and shControl or shTERT1. (C) Gene expression analysis in cells transfected with the indicated plasmids. Target genes are indicated on x-axis. (D) In vivo MYC ubiquitination assay in cells transfected with shTERT and Flag MYC along with HA-Ub. (E) 293T cells were transfected with Flag-MYC  $\Delta$  1-110, His-ubiquitin along with shControl or shTERT 1. 48 h post transfection, the cells were harvested, immunoprecipitated with Ni-NTA beads (IP:HIS), and western blotted with Flag. The right panel shows the inputs. One way ANOVA with Tukey's Multiple Comparison Test was used. \* indicates  $p < 0.05$  vs. shControl, \*\* indicates  $p < 0.01$  vs. shControl, ^ indicates not significant vs. shControl, ### indicates  $p < 0.01$  vs. shTERT + vector. For the western blots, representative images of  $n=3$  independent experiments are shown.

**Supplementary Figure 7:** Vector and TERT overexpressing P493 cells were transfected with siControl or siBrg1 for 48h. A) panel shows relative Brg1 expression. B) panel shows gene expression in the various transfected conditions.

## SUPPLEMENTARY TABLES

**Supplementary Table 1. shRNA sequences.**

| Gene                      | shRNA sequence                         |
|---------------------------|----------------------------------------|
| shTERT-A                  | TTCTGTCATCTACAAACTCGAGTTTGTAGATGACAGAA |
| shTERT-B                  | ACTATGAGCGGACAAACTCGAGTTTGTCCGCTCATAGT |
| shTERT 1                  | CATTTTCATCAGCAAGTTTGA                  |
| shTERT 2                  | GAAGAGTGTCTGGAGCAAGTT                  |
| shTERT 3 (targets 3' UTR) | TGAGGCCTGAGTGAGTGTTTG                  |

**Supplementary Table 2. qPCR primers for gene expression analysis.**

| Human          |                        |                         |
|----------------|------------------------|-------------------------|
| Gene           | Forward Primer         | Reverse Primer          |
| PKM2           | TGCGAGCCTCAAGTCACTCCAC | TCACGGCACAGGAACAACACG   |
| LDHA           | GGCCTGTGCCATCAGTATCT   | ACCAGCTTGGAGTTTGCAGT    |
| ALDOC          | AAATTGGGGTGGAAAACACA   | ACCCTTGTCAACCTTGATGC    |
| HK2            | TCTATGCCATCCCTGAGGAC   | TCTCTGCCTTCCACTCCACT    |
| GAPDH          | GGCGATGCTGGCGCTGAGTA   | ACAGTTTCCCGGAGGGGCCA    |
| c-MYC          | ACGGCCGACCAGCTGGAGAT   | TCGGGCTGCCGCTGTCTTTG    |
| TERT           | CCAAGTTCCTGGACTGGCTGA  | TTCCCGATGCTGCCTGAC      |
| CYCLIN D2      | AGTGCGTGCAGAAGGACATC   | GTTGCAGATGGGACTTCGGA    |
| CYCLIN D1      | GTGCTGCGAAGTGGAACCATC  | GACCTCCTTCTGCACACATTTGA |
| CDK4           | GCCTTCCCATCAGCACAGTTC  | GTCTACATGCTCAAACACCAGGG |
| eIF2a          | ATGGGACCTTGTTTGCCTGG   | CCACGTTGCCAGGACAGTAT    |
| 45s rRNA       | GAACGGTGGTGTGTCGTTT    | GCGTCTCGTCTCGTCTCACT    |
| 5.8s rRNA      | ACTCGGCTCGTGCGTC       | GCGACGCTCAGACAGG        |
| BRG1           | ACCAGATGCACAAGCCCATG   | GCTGGAACTGGACTAGAGGC    |
| $\beta$ -Actin | GCCAACCGCGAGAAGATGA    | CCATCACGATGCCAGTGGTA    |

| MOUSE     |                       |                       |
|-----------|-----------------------|-----------------------|
| Gene      | Forward primer        | Reverse primer        |
| TERT      | GGATTGCCACTGGCTCCG    | TGCCTGACCTCCTCTTGTGAC |
| 45s rRNA  | CGCCCGCGTGTTGGTCTTCT  | CCCAAACCCCGACGAGCCC   |
| 5.8s rRNA | ACTCGGCTCGTGCGTC      | GCGACGCTCAGACAGG      |
| 18s rRNA  | GCCTGCTGCCTTCTTGG     | GATGGTAGTCGCCGTGCC    |
| 28s rRNA  | AGAGGTAAACGGGTGGGGTC  | GGGGTCGGGAGGAACGG     |
| GAPDH     | CATCTTCTTGTGCAGTGCCAG | GGCAACAATCTCCACTTTGCC |
| ENO1      | GAGCGAGAAGTCCTGCAACT  | CTGCGATGAAAGTGTCTCA   |

|         |                         |                       |
|---------|-------------------------|-----------------------|
| LDHA    | AGACAAACTCAAGGGCGAGA    | GCGGTGATAATGACCAGCTT  |
| PKM2    | TGACACCTTCCTGGAACACA    | TTCAGCATCTCCACAGATCG  |
| EXOSC2  | GCTCCTCTCATCCATGAACCT   | CAGCTCCATCCGAGAACACA  |
| GART    | CGTCATTGCTGGAATTGCT     | TTGGGCATCTCTGCTGTCT   |
| CCT7    | CCAGTTATCCTGTTGAAAGAGGG | GACCCAGGGTGGTTCTTACA  |
| MCM6    | GCTGTTCTAGACTTCCTGGA    | CAACCAGCGTGTTTCTCTCAG |
| MYBBP1A | GCCGCGAGTTCTTGGACTT     | ATCTCCGAATCATTGGGCCTT |
| β-Actin | CAGCTTCTTTGCAGCTCCTT    | CAGCTTCTTTGCAGCTCCTT  |

**Supplementary Table 3. ChIP primers.**

| Human     |                       |                       |
|-----------|-----------------------|-----------------------|
| Gene      | Forward Primer        | Reverse Primer        |
| LDHA      | GGAGGGCAGCACCTTACTTA  | AGGGGCCTTAAGTGGAACAG  |
| CDK4      | GAGCGACCCTTCATAACCA   | GGGCTGGCGTGAGGTAAGT   |
| HK2       | GATTGCCTCGCATCTGC     | AGCCACGATTCTCTCCACG   |
| PKM2      | TTTGGAGGAGTCTGCAAAGG  | CACTCCCAAGGACCAAGTGT  |
| TERT      | GCGCGAGTTTCAGGCAG     | CACCTCGCGGTAGTGGCT    |
| rDNA (H1) | GGCGGTTTGAGTGAGACGAGA | ACGTGCGCTCACCGAGAGCAG |
| rDNA (H4) | CGACGACCCATTCGAACGTCT | CTCTCCGGAATCGAACCTGA  |
| ZNF77     | GCACCCCTGATTGGAGAAT   | TCAGAGACGTTAATCCGAAGC |
| JMJD2B    | CTGAGGCTCCCTTGTC AATC | CGGCTCTGTTCTCATTGGAG  |
| RUVBL2    | GAGGAGGAGGGTGGGATAAA  | GGCCGATTGCAAAATTCTTA  |

| Mouse |                      |                     |
|-------|----------------------|---------------------|
| Gene  | Forward Primer       | Reverse Primer      |
| BXDC1 | GATCCCTTAGCGAATGCACG | GGCTTCCCGGAAGTAATCG |

|         |                     |                      |
|---------|---------------------|----------------------|
| GART    | ACCTCCATCAAGGCCGTGC | GTGACTGGCGAAAAGCCCAC |
| HSPD1   | CGCCACACGTGATGAAACC | TCGGCTCACTTGTCCAGGC  |
| MYBBP1A | AGCCCACGTGTTTGGCTC  | GGGCTCTTCATCTCCGCC   |

**Supplementary Table 4. Statistical analysis.**

|                                         |            |        |          |                   |
|-----------------------------------------|------------|--------|----------|-------------------|
| Statistics for Figure 1D                |            |        |          |                   |
| One-way analysis of variance            |            |        |          |                   |
| P value                                 | P<0.0001   |        |          |                   |
| P value summary                         | ***        |        |          |                   |
| Are means signif. different? (P < 0.05) | Yes        |        |          |                   |
| Number of groups                        | 7          |        |          |                   |
| F                                       | 8.334      |        |          |                   |
| R squared                               | 0.685      |        |          |                   |
| ANOVA Table                             | SS         | df     | MS       |                   |
| Treatment (between columns)             | 2.12       | 6      | 0.3533   |                   |
| Residual (within columns)               | 0.975      | 23     | 0.04239  |                   |
| Total                                   | 3.095      | 29     |          |                   |
| Dunnett's Multiple Comparison Test      | Mean Diff. | q      | P value  | 95% CI of diff    |
| Control vs shTERT-A                     | 0.4878     | 3.351  | P < 0.05 | 0.08453 to 0.8911 |
| Control vs shTERT-B                     | 0.6385     | 4.385  | P < 0.01 | 0.2352 to 1.042   |
| Control vs shTERC                       | 0.05953    | 0.4089 | P > 0.05 | -0.3437 to 0.4628 |
| Control vs TERT                         | -0.02415   | 0.1659 | P > 0.05 | -0.4274 to 0.3791 |
| Control vs TERT; shTERT-A               | 0.05812    | 0.4208 | P > 0.05 | -0.3245 to 0.4407 |
| Control vs TERT; shTERT-B               | -0.1416    | 1.025  | P > 0.05 | -0.5242 to 0.2410 |



|                                                         |               |                     |              |              |               |
|---------------------------------------------------------|---------------|---------------------|--------------|--------------|---------------|
| Statistics for Fig S1B                                  |               |                     |              |              |               |
| ANOVA summary                                           |               |                     |              |              |               |
| F                                                       | 127.1         |                     |              |              |               |
| P value                                                 | < 0.0001      |                     |              |              |               |
| P value summary                                         | ****          |                     |              |              |               |
| Are differences among means statistically significant?  | Yes           |                     |              |              |               |
| R square                                                | 0.9769        |                     |              |              |               |
| Brown-Forsythe test                                     |               |                     |              |              |               |
| F (DFn, DFd)                                            | 1.724 (5, 15) |                     |              |              |               |
| P value                                                 | 0.1898        |                     |              |              |               |
| P value summary                                         | ns            |                     |              |              |               |
| Significantly different standard deviations? (P < 0.05) | No            |                     |              |              |               |
| Bartlett's test                                         |               |                     |              |              |               |
| Bartlett's statistic (corrected)                        |               |                     |              |              |               |
| P value                                                 |               |                     |              |              |               |
| P value summary                                         |               |                     |              |              |               |
| Significantly different standard deviations? (P < 0.05) |               |                     |              |              |               |
| ANOVA table                                             |               |                     |              |              |               |
|                                                         | SS            | DF                  | MS           | F (DFn, DFd) | P value       |
| Treatment (between columns)                             | 1.743         |                     | 5            | 0.3485       | F (5, 15) = 1 |
| Residual (within columns)                               | 0.04113       |                     | 15           | 0.002742     | P < 0.0001    |
| Total                                                   | 1.784         |                     | 20           |              |               |
| Data summary                                            |               |                     |              |              |               |
| Number of treatments (columns)                          | 6             |                     |              |              |               |
| Number of values (total)                                | 21            |                     |              |              |               |
| Number of families                                      | 1             |                     |              |              |               |
| Number of comparisons per family                        | 15            |                     |              |              |               |
| Alpha                                                   | 0.05          |                     |              |              |               |
| Tukey's multiple comparisons test                       |               |                     |              |              |               |
|                                                         | Mean Diff.    | 95% CI of diff.     | Significant? | Summary      |               |
| shControl vs. shTERT-A                                  | 0.5431        | 0.4228 to 0.6634    | Yes          | ****         |               |
| shControl vs. shTERT-B                                  | 0.7579        | 0.6376 to 0.8782    | Yes          | ****         |               |
| shControl vs. shControl +TERT                           | -0.009285     | -0.1392 to 0.1207   | No           | ns           |               |
| shControl vs. shTERT-A +TERT                            | 0.2129        | 0.08299 to 0.3429   | Yes          | ***          |               |
| shControl vs. shTERT-B +TERT                            | 0.3765        | 0.2466 to 0.5065    | Yes          | ****         |               |
| shTERT-A vs. shTERT-B                                   | 0.2148        | 0.09445 to 0.3351   | Yes          | ***          |               |
| shTERT-A vs. shControl +TERT                            | -0.5524       | -0.6823 to -0.4225  | Yes          | ****         |               |
| shTERT-A vs. shTERT-A +TERT                             | -0.3302       | -0.4601 to -0.2002  | Yes          | ****         |               |
| shTERT-A vs. shTERT-B +TERT                             | -0.1666       | -0.2965 to -0.03663 | Yes          | **           |               |
| shTERT-B vs. shControl +TERT                            | -0.7672       | -0.8971 to -0.6372  | Yes          | ****         |               |
| shTERT-B vs. shTERT-A +TERT                             | -0.5449       | -0.6749 to -0.4150  | Yes          | ****         |               |
| shTERT-B vs. shTERT-B +TERT                             | -0.3813       | -0.5113 to -0.2514  | Yes          | ****         |               |
| shControl +TERT vs. shTERT-A +TERT                      | 0.2222        | 0.08331 to 0.3611   | Yes          | **           |               |
| shControl +TERT vs. shTERT-B +TERT                      | 0.3858        | 0.2469 to 0.5247    | Yes          | ****         |               |
| shTERT-A +TERT vs. shTERT-B +TERT                       | 0.1636        | 0.02470 to 0.3025   | Yes          | *            |               |
| Symbol                                                  |               |                     |              |              |               |
|                                                         | Meaning       |                     |              |              |               |
| ns                                                      | P > 0.05      |                     |              |              |               |
| *                                                       | P ≤ 0.05      |                     |              |              |               |
| **                                                      | P ≤ 0.01      |                     |              |              |               |
| ***                                                     | P ≤ 0.001     |                     |              |              |               |
| ****                                                    | P ≤ 0.0001    |                     |              |              |               |

| Statistics for Figure S1C                               |               |                      |              |                   |            |
|---------------------------------------------------------|---------------|----------------------|--------------|-------------------|------------|
| ANOVA summary                                           |               |                      |              |                   |            |
| F                                                       | 159.3         |                      |              |                   |            |
| P value                                                 | < 0.0001      |                      |              |                   |            |
| P value summary                                         | ****          |                      |              |                   |            |
| Are differences among means statistically significant?  | Yes           |                      |              |                   |            |
| R square                                                | 0.9779        |                      |              |                   |            |
| Brown-Forsythe test                                     |               |                      |              |                   |            |
| F (DFn, DFd)                                            | 9.867 (5, 18) |                      |              |                   |            |
| P value                                                 | 0.0001        |                      |              |                   |            |
| P value summary                                         | ***           |                      |              |                   |            |
| Significantly different standard deviations? (P < 0.05) | Yes           |                      |              |                   |            |
| Bartlett's test                                         |               |                      |              |                   |            |
| Bartlett's statistic (corrected)                        | +infinity     |                      |              |                   |            |
| P value                                                 | < 0.0001      |                      |              |                   |            |
| P value summary                                         | ****          |                      |              |                   |            |
| Significantly different standard deviations? (P < 0.05) | Yes           |                      |              |                   |            |
| ANOVA table                                             |               |                      |              |                   |            |
|                                                         | SS            | DF                   | MS           | F (DFn, DFd)      | P value    |
| Treatment (between columns)                             | 2.044         | 5                    | 0.4087       | F (5, 18) = 159.3 | P < 0.0001 |
| Residual (within columns)                               | 0.04618       | 18                   | 0.002566     |                   |            |
| Total                                                   | 2.09          | 23                   |              |                   |            |
| Data summary                                            |               |                      |              |                   |            |
| Number of treatments (columns)                          | 6             |                      |              |                   |            |
| Number of values (total)                                | 24            |                      |              |                   |            |
| Number of families                                      | 1             |                      |              |                   |            |
| Number of comparisons per family                        | 15            |                      |              |                   |            |
| Alpha                                                   | 0.05          |                      |              |                   |            |
| Tukey's multiple comparisons test                       |               |                      |              |                   |            |
|                                                         | Mean Diff.    | 95% CI of diff.      | Significant? | Summary           |            |
| Wildtype- shControl vs. Wildtype- shTERT-A              | 0.09126       | -0.02257 to 0.2051   | No           | ns                |            |
| Wildtype- shControl vs. Wildtype- shTERT-B              | 0.12          | 0.006154 to 0.2338   | Yes          | *                 |            |
| Wildtype- shControl vs. EuMYC- shControl                | 0             | -0.1138 to 0.1138    | No           | ns                |            |
| Wildtype- shControl vs. EuMYC- shTERT-A                 | 0.5431        | 0.4293 to 0.6569     | Yes          | ****              |            |
| Wildtype- shControl vs. EuMYC- shTERT-B                 | 0.7579        | 0.6441 to 0.8717     | Yes          | ****              |            |
| Wildtype- shTERT-A vs. Wildtype- shTERT-B               | 0.02872       | -0.08510 to 0.1425   | No           | ns                |            |
| Wildtype- shTERT-A vs. EuMYC- shControl                 | -0.09126      | -0.2051 to 0.02257   | No           | ns                |            |
| Wildtype- shTERT-A vs. EuMYC- shTERT-A                  | 0.4519        | 0.3380 to 0.5657     | Yes          | ****              |            |
| Wildtype- shTERT-A vs. EuMYC- shTERT-B                  | 0.6666        | 0.5528 to 0.7804     | Yes          | ****              |            |
| Wildtype- shTERT-B vs. EuMYC- shControl                 | -0.12         | -0.2338 to -0.006154 | Yes          | *                 |            |
| Wildtype- shTERT-B vs. EuMYC- shTERT-A                  | 0.4231        | 0.3093 to 0.5370     | Yes          | ****              |            |
| Wildtype- shTERT-B vs. EuMYC- shTERT-B                  | 0.6379        | 0.5241 to 0.7517     | Yes          | ****              |            |
| EuMYC- shControl vs. EuMYC- shTERT-A                    | 0.5431        | 0.4293 to 0.6569     | Yes          | ****              |            |
| EuMYC- shControl vs. EuMYC- shTERT-B                    | 0.7579        | 0.6441 to 0.8717     | Yes          | ****              |            |
| EuMYC- shTERT-A vs. EuMYC- shTERT-B                     | 0.2148        | 0.1009 to 0.3286     | Yes          | ***               |            |
| Symbol                                                  |               |                      |              |                   |            |
| ns                                                      | Meaning       |                      |              |                   |            |
| ns                                                      | P > 0.05      |                      |              |                   |            |
| *                                                       | P ≤ 0.05      |                      |              |                   |            |
| **                                                      | P ≤ 0.01      |                      |              |                   |            |
| ***                                                     | P ≤ 0.001     |                      |              |                   |            |
| ****                                                    | P ≤ 0.0001    |                      |              |                   |            |

| Statistics for Figure 2D                   |            |       |          |                    |
|--------------------------------------------|------------|-------|----------|--------------------|
| WBC                                        |            |       |          |                    |
| One-way analysis of variance               |            |       |          |                    |
| P value                                    | 0.0087     |       |          |                    |
| P value summary                            | **         |       |          |                    |
| Are means signif. different? (P < 0.05)    | Yes        |       |          |                    |
| Number of groups                           | 3          |       |          |                    |
| F                                          | 5.206      |       |          |                    |
| R squared                                  | 0.1668     |       |          |                    |
| Bartlett's test for equal variances        |            |       |          |                    |
| Bartlett's statistic (corrected)           | 26.79      |       |          |                    |
| P value                                    | P<0.0001   |       |          |                    |
| P value summary                            | ***        |       |          |                    |
| Do the variances differ signif. (P < 0.05) | Yes        |       |          |                    |
| ANOVA Table                                |            |       |          |                    |
|                                            | SS         | df    | MS       |                    |
| Treatment (between columns)                | 1779       | 2     | 889.6    |                    |
| Residual (within columns)                  | 8887       | 52    | 170.9    |                    |
| Total                                      | 10670      | 54    |          |                    |
| Dunnett's Multiple Comparison Test         |            |       |          |                    |
|                                            | Mean Diff. | q     | P value  | 95% CI of diff     |
| EuMYC; TERT+/- vs EuMYC; TERT+/-           | 11.31      | 2.284 | P < 0.05 | 0.02878 to 22.59   |
| EuMYC; TERT+/- vs EuMYC; TERT-/-           | 16.08      | 3.226 | P < 0.01 | 4.726 to 27.44     |
| Tumor                                      |            |       |          |                    |
| One-way analysis of variance               |            |       |          |                    |
| P value                                    | 0.0093     |       |          |                    |
| P value summary                            | **         |       |          |                    |
| Are means signif. different? (P < 0.05)    | Yes        |       |          |                    |
| Number of groups                           | 3          |       |          |                    |
| F                                          | 5.182      |       |          |                    |
| R squared                                  | 0.1839     |       |          |                    |
| Bartlett's test for equal variances        |            |       |          |                    |
| Bartlett's statistic (corrected)           | 203.7      |       |          |                    |
| P value                                    | P<0.0001   |       |          |                    |
| P value summary                            | ***        |       |          |                    |
| Do the variances differ signif. (P < 0.05) | Yes        |       |          |                    |
| ANOVA Table                                |            |       |          |                    |
|                                            | SS         | df    | MS       |                    |
| Treatment (between columns)                | 62.98      | 2     | 31.49    |                    |
| Residual (within columns)                  | 279.6      | 46    | 6.077    |                    |
| Total                                      | 342.5      | 48    |          |                    |
| Dunnett's Multiple Comparison Test         |            |       |          |                    |
|                                            | Mean Diff. | q     | P value  | 95% CI of diff     |
| EuMYC; TERT+/- vs EuMYC; TERT+/-           | 2.183      | 2.543 | P < 0.05 | 0.2220 to 4.144    |
| EuMYC; TERT+/- vs EuMYC; TERT-/-           | 2.541      | 2.96  | P < 0.01 | 0.5802 to 4.503    |
| Spleen (% body weight)                     |            |       |          |                    |
| One-way analysis of variance               |            |       |          |                    |
| P value                                    | 0.0067     |       |          |                    |
| P value summary                            | **         |       |          |                    |
| Are means signif. different? (P < 0.05)    | Yes        |       |          |                    |
| Number of groups                           | 3          |       |          |                    |
| F                                          | 5.598      |       |          |                    |
| R squared                                  | 0.1957     |       |          |                    |
| Bartlett's test for equal variances        |            |       |          |                    |
| Bartlett's statistic (corrected)           | 22.74      |       |          |                    |
| P value                                    | P<0.0001   |       |          |                    |
| P value summary                            | ***        |       |          |                    |
| Do the variances differ signif. (P < 0.05) | Yes        |       |          |                    |
| ANOVA Table                                |            |       |          |                    |
|                                            | SS         | df    | MS       |                    |
| Treatment (between columns)                | 4.432      | 2     | 2.216    |                    |
| Residual (within columns)                  | 18.21      | 46    | 0.3959   |                    |
| Total                                      | 22.64      | 48    |          |                    |
| Dunnett's Multiple Comparison Test         |            |       |          |                    |
|                                            | Mean Diff. | q     | P value  | 95% CI of diff     |
| EuMYC; TERT+/- vs EuMYC; TERT+/-           | 0.4721     | 2.154 | P > 0.05 | -0.02841 to 0.9727 |
| EuMYC; TERT+/- vs EuMYC; TERT-/-           | 0.7196     | 3.284 | P < 0.01 | 0.2191 to 1.220    |

| Statistics for Figure S3C                               |               |                      |              |                    |            |
|---------------------------------------------------------|---------------|----------------------|--------------|--------------------|------------|
| Cyclin D1                                               |               |                      |              |                    |            |
| ANOVA summary                                           |               |                      |              |                    |            |
| F                                                       | 259.4         |                      |              |                    |            |
| P value                                                 | < 0.0001      |                      |              |                    |            |
| P value summary                                         | ****          |                      |              |                    |            |
| Are differences among means statistically significant?  | Yes           |                      |              |                    |            |
| R square                                                | 0.9774        |                      |              |                    |            |
| Brown-Forsythe test                                     |               |                      |              |                    |            |
| F (DFn, DFd)                                            | 3.373 (5, 30) |                      |              |                    |            |
| P value                                                 | 0.0155        |                      |              |                    |            |
| P value summary                                         | *             |                      |              |                    |            |
| Significantly different standard deviations? (P < 0.05) | Yes           |                      |              |                    |            |
| Bartlett's test                                         |               |                      |              |                    |            |
| Bartlett's statistic (corrected)                        | 13.48         |                      |              |                    |            |
| P value                                                 | 0.0193        |                      |              |                    |            |
| P value summary                                         | *             |                      |              |                    |            |
| Significantly different standard deviations? (P < 0.05) | Yes           |                      |              |                    |            |
| ANOVA table                                             |               |                      |              |                    |            |
|                                                         | SS            | DF                   | MS           | F (DFn, DFd)       | P value    |
| Treatment (between columns)                             | 0.508         | 5                    | 0.1016       | F (5, 30) = 2.1016 | P < 0.0001 |
| Residual (within columns)                               | 0.01175       | 30                   | 0.0003917    |                    |            |
| Total                                                   | 0.5198        | 35                   |              |                    |            |
| Data summary                                            |               |                      |              |                    |            |
| Number of treatments (columns)                          | 6             |                      |              |                    |            |
| Number of values (total)                                | 36            |                      |              |                    |            |
| Number of families                                      | 1             |                      |              |                    |            |
| Number of comparisons per family                        | 15            |                      |              |                    |            |
| Alpha                                                   | 0.05          |                      |              |                    |            |
| Tukey's multiple comparisons test                       |               |                      |              |                    |            |
|                                                         | Mean Diff.    | 95% CI of diff.      | Significant? | Summary            |            |
| shControl vs. shTERT 1                                  | 0.2711        | 0.2363 to 0.3059     | Yes          | ****               |            |
| shControl vs. shTERT 2                                  | 0.2109        | 0.1762 to 0.2456     | Yes          | ****               |            |
| shControl vs. shTERT 3                                  | 0.1621        | 0.1273 to 0.1969     | Yes          | ****               |            |
| shControl vs. shTERT 3 + TERT WT                        | -0.009609     | -0.04436 to 0.02514  | No           | ns                 |            |
| shControl vs. shTERT 3 + TERT DN                        | -0.03125      | -0.06601 to 0.00351  | No           | ns                 |            |
| shTERT 1 vs. shTERT 2                                   | -0.06014      | -0.09489 to -0.02539 | Yes          | ***                |            |
| shTERT 1 vs. shTERT 3                                   | -0.109        | -0.1437 to -0.0743   | Yes          | ****               |            |
| shTERT 1 vs. shTERT 3 + TERT WT                         | -0.2807       | -0.3154 to -0.246    | Yes          | ****               |            |
| shTERT 1 vs. shTERT 3 + TERT DN                         | -0.3023       | -0.3371 to -0.2675   | Yes          | ****               |            |
| shTERT 2 vs. shTERT 3                                   | -0.04885      | -0.08361 to -0.0141  | Yes          | **                 |            |
| shTERT 2 vs. shTERT 3 + TERT WT                         | -0.2205       | -0.2553 to -0.1857   | Yes          | ****               |            |
| shTERT 2 vs. shTERT 3 + TERT DN                         | -0.2422       | -0.2769 to -0.2075   | Yes          | ****               |            |
| shTERT 3 vs. shTERT 3 + TERT WT                         | -0.1717       | -0.2065 to -0.1369   | Yes          | ****               |            |
| shTERT 3 vs. shTERT 3 + TERT DN                         | -0.1933       | -0.2281 to -0.1585   | Yes          | ****               |            |
| shTERT 3 + TERT WT vs. shTERT 3 + TERT DN               | -0.02164      | -0.05640 to 0.01312  | No           | ns                 |            |
| Nucleolin                                               |               |                      |              |                    |            |
| ANOVA summary                                           |               |                      |              |                    |            |
| F                                                       | 1375          |                      |              |                    |            |
| P value                                                 | < 0.0001      |                      |              |                    |            |
| P value summary                                         | ****          |                      |              |                    |            |
| Are differences among means statistically significant?  | Yes           |                      |              |                    |            |
| R square                                                | 0.9957        |                      |              |                    |            |
| Brown-Forsythe test                                     |               |                      |              |                    |            |
| F (DFn, DFd)                                            | 4.028 (5, 30) |                      |              |                    |            |
| P value                                                 | 0.0065        |                      |              |                    |            |
| P value summary                                         | **            |                      |              |                    |            |
| Significantly different standard deviations? (P < 0.05) | Yes           |                      |              |                    |            |
| Bartlett's test                                         |               |                      |              |                    |            |
| Bartlett's statistic (corrected)                        | 12.84         |                      |              |                    |            |
| P value                                                 | 0.0249        |                      |              |                    |            |
| P value summary                                         | *             |                      |              |                    |            |
| Significantly different standard deviations? (P < 0.05) | Yes           |                      |              |                    |            |
| ANOVA table                                             |               |                      |              |                    |            |
|                                                         | SS            | DF                   | MS           | F (DFn, DFd)       | P value    |
| Treatment (between columns)                             | 3.641         | 5                    | 0.7282       | F (5, 30) = 13.75  | P < 0.0001 |
| Residual (within columns)                               | 0.01589       | 30                   | 0.0005298    |                    |            |
| Total                                                   | 3.657         | 35                   |              |                    |            |
| Data summary                                            |               |                      |              |                    |            |
| Number of treatments (columns)                          | 6             |                      |              |                    |            |

|                                                         |               |                |              |                   |            |
|---------------------------------------------------------|---------------|----------------|--------------|-------------------|------------|
| Number of values (total)                                | 36            |                |              |                   |            |
| Number of families                                      | 1             |                |              |                   |            |
| Number of comparisons per family                        | 15            |                |              |                   |            |
| Alpha                                                   | 0.05          |                |              |                   |            |
| Tukey's multiple comparisons test                       | Mean Diff.    | 95% CI of d    | Significant? | Summary           |            |
| shControl vs. shTERT 1                                  | 0.8011        | 0.7607 to 0    | Yes          | ****              |            |
| shControl vs. shTERT 2                                  | 0.7109        | 0.6705 to 0    | Yes          | ****              |            |
| shControl vs. shTERT 3                                  | 0.6297        | 0.5892 to 0    | Yes          | ****              |            |
| shControl vs. shTERT 3 + TERT WT                        | 0.03064       | -0.009783 to 0 | No           | ns                |            |
| shControl vs. shTERT 3 + TERT DN                        | 0.3492        | 0.3088 to 0    | Yes          | ****              |            |
| shTERT 1 vs. shTERT 2                                   | -0.09017      | -0.1306 to -   | Yes          | ****              |            |
| shTERT 1 vs. shTERT 3                                   | -0.1714       | -0.2119 to -   | Yes          | ****              |            |
| shTERT 1 vs. shTERT 3 + TERT WT                         | -0.7705       | -0.8109 to -   | Yes          | ****              |            |
| shTERT 1 vs. shTERT 3 + TERT DN                         | -0.4519       | -0.4923 to -   | Yes          | ****              |            |
| shTERT 2 vs. shTERT 3                                   | -0.08127      | -0.1217 to -   | Yes          | ****              |            |
| shTERT 2 vs. shTERT 3 + TERT WT                         | -0.6803       | -0.7207 to -   | Yes          | ****              |            |
| shTERT 2 vs. shTERT 3 + TERT DN                         | -0.3617       | -0.4021 to -   | Yes          | ****              |            |
| shTERT 3 vs. shTERT 3 + TERT WT                         | -0.599        | -0.6394 to -   | Yes          | ****              |            |
| shTERT 3 vs. shTERT 3 + TERT DN                         | -0.2804       | -0.3208 to -   | Yes          | ****              |            |
| shTERT 3 + TERT WT vs. shTERT 3 + TERT DN               | 0.3186        | 0.2782 to 0    | Yes          | ****              |            |
| elf2a                                                   |               |                |              |                   |            |
| ANOVA summary                                           |               |                |              |                   |            |
| F                                                       | 29.64         |                |              |                   |            |
| P value                                                 | < 0.0001      |                |              |                   |            |
| P value summary                                         | ****          |                |              |                   |            |
| Are differences among means statistically significant?  | Yes           |                |              |                   |            |
| R square                                                | 0.8317        |                |              |                   |            |
| Brown-Forsythe test                                     |               |                |              |                   |            |
| F (DFn, DFd)                                            | 2.660 (5, 30) |                |              |                   |            |
| P value                                                 | 0.0418        |                |              |                   |            |
| P value summary                                         | *             |                |              |                   |            |
| Significantly different standard deviations? (P < 0.05) | Yes           |                |              |                   |            |
| Bartlett's test                                         |               |                |              |                   |            |
| Bartlett's statistic (corrected)                        | 15.12         |                |              |                   |            |
| P value                                                 | 0.0099        |                |              |                   |            |
| P value summary                                         | **            |                |              |                   |            |
| Significantly different standard deviations? (P < 0.05) | Yes           |                |              |                   |            |
| ANOVA table                                             | SS            | DF             | MS           | F (DFn, DFd)      | P value    |
| Treatment (between columns)                             | 0.1289        | 5              | 0.02578      | F (5, 30) = 2.660 | P < 0.0001 |
| Residual (within columns)                               | 0.02609       | 30             | 0.0008697    |                   |            |
| Total                                                   | 0.155         | 35             |              |                   |            |
| Data summary                                            |               |                |              |                   |            |
| Number of treatments (columns)                          | 6             |                |              |                   |            |
| Number of values (total)                                | 36            |                |              |                   |            |
| Number of families                                      | 1             |                |              |                   |            |
| Number of comparisons per family                        | 15            |                |              |                   |            |
| Alpha                                                   | 0.05          |                |              |                   |            |
| Tukey's multiple comparisons test                       | Mean Diff.    | 95% CI of d    | Significant? | Summary           |            |
| shControl vs. shTERT 1                                  | 0.1601        | 0.1083 to 0    | Yes          | ****              |            |
| shControl vs. shTERT 2                                  | 0.1201        | 0.06835 to 0   | Yes          | ****              |            |
| shControl vs. shTERT 3                                  | 0.08768       | 0.03589 to 0   | Yes          | ***               |            |
| shControl vs. shTERT 3 + TERT WT                        | 0.007771      | -0.04402 to 0  | No           | ns                |            |
| shControl vs. shTERT 3 + TERT DN                        | 0.02738       | -0.02441 to 0  | No           | ns                |            |
| shTERT 1 vs. shTERT 2                                   | -0.03994      | -0.09173 to 0  | No           | ns                |            |
| shTERT 1 vs. shTERT 3                                   | -0.0724       | -0.1242 to -   | Yes          | **                |            |
| shTERT 1 vs. shTERT 3 + TERT WT                         | -0.1523       | -0.2041 to -   | Yes          | ****              |            |
| shTERT 1 vs. shTERT 3 + TERT DN                         | -0.1327       | -0.1845 to -   | Yes          | ****              |            |
| shTERT 2 vs. shTERT 3                                   | -0.03246      | -0.08425 to 0  | No           | ns                |            |
| shTERT 2 vs. shTERT 3 + TERT WT                         | -0.1124       | -0.1642 to -   | Yes          | ****              |            |
| shTERT 2 vs. shTERT 3 + TERT DN                         | -0.09276      | -0.1445 to -   | Yes          | ****              |            |
| shTERT 3 vs. shTERT 3 + TERT WT                         | -0.07991      | -0.1317 to -   | Yes          | ***               |            |
| shTERT 3 vs. shTERT 3 + TERT DN                         | -0.0603       | -0.1121 to -   | Yes          | *                 |            |
| shTERT 3 + TERT WT vs. shTERT 3 + TERT DN               | 0.01961       | -0.03218 to 0  | No           | ns                |            |
| Symbol                                                  | Meaning       |                |              |                   |            |
| ns                                                      | P > 0.05      |                |              |                   |            |
| *                                                       | P ≤ 0.05      |                |              |                   |            |

|      |                 |  |  |  |  |
|------|-----------------|--|--|--|--|
| **   | $P \leq 0.01$   |  |  |  |  |
| ***  | $P \leq 0.001$  |  |  |  |  |
| **** | $P \leq 0.0001$ |  |  |  |  |
|      |                 |  |  |  |  |

| Statistics For Figure S3D                              |               |                      |              |                   |            |
|--------------------------------------------------------|---------------|----------------------|--------------|-------------------|------------|
| <b>H1</b>                                              |               |                      |              |                   |            |
| ANOVA summary                                          |               |                      |              |                   |            |
| F                                                      | 10.5          |                      |              |                   |            |
| P value                                                | < 0.0001      |                      |              |                   |            |
| P value summary                                        | ****          |                      |              |                   |            |
| Are differences among means statistically significant? | Yes           |                      |              |                   |            |
| R square                                               | 0.6363        |                      |              |                   |            |
| Brown-Forsythe test                                    |               |                      |              |                   |            |
| F (DFn, DFd)                                           | 9.745 (5, 30) |                      |              |                   |            |
| P value                                                | < 0.0001      |                      |              |                   |            |
| P value summary                                        | ****          |                      |              |                   |            |
| Significantly different standard deviations? (P)       | Yes           |                      |              |                   |            |
| Bartlett's test                                        |               |                      |              |                   |            |
| Bartlett's statistic (corrected)                       | 52.59         |                      |              |                   |            |
| P value                                                | < 0.0001      |                      |              |                   |            |
| P value summary                                        | ****          |                      |              |                   |            |
| Significantly different standard deviations? (P)       | Yes           |                      |              |                   |            |
| ANOVA table                                            |               |                      |              |                   |            |
|                                                        | SS            | DF                   | MS           | F (DFn, DFd)      | P value    |
| Treatment (between columns)                            | 0.02386       | 5                    | 0.004772     | F (5, 30) = 10.50 | P < 0.0001 |
| Residual (within columns)                              | 0.01364       | 30                   | 0.0004547    |                   |            |
| Total                                                  | 0.0375        | 35                   |              |                   |            |
| Data summary                                           |               |                      |              |                   |            |
| Number of treatments (columns)                         | 6             |                      |              |                   |            |
| Number of values (total)                               | 36            |                      |              |                   |            |
| Number of families                                     | 1             |                      |              |                   |            |
| Number of comparisons per family                       | 15            |                      |              |                   |            |
| Alpha                                                  | 0.05          |                      |              |                   |            |
| Tukey's multiple comparisons test                      |               |                      |              |                   |            |
|                                                        | Mean Diff.    | 95% CI of diff.      | Significant? | Summary           |            |
| shControl vs. shTERT 1                                 | 0.06212       | 0.02467 to 0.09958   | Yes          | ***               |            |
| shControl vs. shTERT 2                                 | 0.06525       | 0.02781 to 0.10270   | Yes          | ***               |            |
| shControl vs. shTERT 3                                 | 0.04387       | 0.006428 to 0.08131  | Yes          | *                 |            |
| shControl vs. shTERT 3 + TERT WT                       | 0.03202       | -0.005430 to 0.00939 | No           | ns                |            |
| shControl vs. shTERT 3 + TERT DN                       | 0.00313       | -0.03432 to 0.04406  | No           | ns                |            |
| shTERT 1 vs. shTERT 2                                  | 0.003132      | -0.03431 to 0.04406  | No           | ns                |            |
| shTERT 1 vs. shTERT 3                                  | -0.01825      | -0.05569 to 0.01919  | No           | ns                |            |
| shTERT 1 vs. shTERT 3 + TERT WT                        | -0.0301       | -0.06755 to 0.00735  | No           | ns                |            |
| shTERT 1 vs. shTERT 3 + TERT DN                        | -0.05899      | -0.09644 to -0.02154 | Yes          | ***               |            |
| shTERT 2 vs. shTERT 3                                  | -0.02138      | -0.05882 to 0.01606  | No           | ns                |            |
| shTERT 2 vs. shTERT 3 + TERT WT                        | -0.03324      | -0.07068 to 0.00420  | No           | ns                |            |
| shTERT 2 vs. shTERT 3 + TERT DN                        | -0.06212      | -0.09957 to -0.02467 | Yes          | ***               |            |
| shTERT 3 vs. shTERT 3 + TERT WT                        | -0.01186      | -0.04930 to 0.02558  | No           | ns                |            |
| shTERT 3 vs. shTERT 3 + TERT DN                        | -0.04074      | -0.07819 to -0.00329 | Yes          | *                 |            |
| shTERT 3 + TERT WT vs. shTERT 3 + TERT DN              | -0.02889      | -0.06633 to 0.00855  | No           | ns                |            |
| <b>H4</b>                                              |               |                      |              |                   |            |
| ANOVA summary                                          |               |                      |              |                   |            |
| F                                                      | 101           |                      |              |                   |            |
| P value                                                | < 0.0001      |                      |              |                   |            |
| P value summary                                        | ****          |                      |              |                   |            |
| Are differences among means statistically significant? | Yes           |                      |              |                   |            |
| R square                                               | 0.9439        |                      |              |                   |            |
| Brown-Forsythe test                                    |               |                      |              |                   |            |
| F (DFn, DFd)                                           | 6.367 (5, 30) |                      |              |                   |            |
| P value                                                | 0.0004        |                      |              |                   |            |
| P value summary                                        | ***           |                      |              |                   |            |
| Significantly different standard deviations? (P)       | Yes           |                      |              |                   |            |
| Bartlett's test                                        |               |                      |              |                   |            |
| Bartlett's statistic (corrected)                       | 11.22         |                      |              |                   |            |
| P value                                                | 0.0473        |                      |              |                   |            |
| P value summary                                        | *             |                      |              |                   |            |
| Significantly different standard deviations? (P)       | Yes           |                      |              |                   |            |
| ANOVA table                                            |               |                      |              |                   |            |
|                                                        | SS            | DF                   | MS           | F (DFn, DFd)      | P value    |
| Treatment (between columns)                            | 0.004544      | 5                    | 0.0009088    | F (5, 30) = 101.0 | P < 0.0001 |
| Residual (within columns)                              | 0.00027       | 30                   | 8.999E-06    |                   |            |
| Total                                                  | 0.004814      | 35                   |              |                   |            |
| Data summary                                           |               |                      |              |                   |            |
| Number of treatments (columns)                         | 6             |                      |              |                   |            |
| Number of values (total)                               | 36            |                      |              |                   |            |
| Number of families                                     | 1             |                      |              |                   |            |
| Number of comparisons per family                       | 15            |                      |              |                   |            |
| Alpha                                                  | 0.05          |                      |              |                   |            |

| Tukey's multiple comparisons test         | Mean Diff. | 95% CI of diff.       | Significant? | Summary |  |
|-------------------------------------------|------------|-----------------------|--------------|---------|--|
| shControl vs. shTERT 1                    | 0.03145    | 0.02618 to 0.03672    | Yes          | ****    |  |
| shControl vs. shTERT 2                    | 0.02809    | 0.02282 to 0.03336    | Yes          | ****    |  |
| shControl vs. shTERT 3                    | 0.01275    | 0.007478 to 0.01802   | Yes          | ****    |  |
| shControl vs. shTERT 3 + TERT WT          | 0.006111   | 0.0008431 to 0.01138  | Yes          | *       |  |
| shControl vs. shTERT 3 + TERT DN          | 0.01248    | 0.007209 to 0.01776   | Yes          | ****    |  |
| shTERT 1 vs. shTERT 2                     | -0.003361  | -0.008629 to 0.001907 | No           | ns      |  |
| shTERT 1 vs. shTERT 3                     | -0.01871   | -0.02397 to -0.01345  | Yes          | ****    |  |
| shTERT 1 vs. shTERT 3 + TERT WT           | -0.02534   | -0.03061 to -0.02007  | Yes          | ****    |  |
| shTERT 1 vs. shTERT 3 + TERT DN           | -0.01897   | -0.02424 to -0.0137   | Yes          | ****    |  |
| shTERT 2 vs. shTERT 3                     | -0.01534   | -0.02061 to -0.01007  | Yes          | ****    |  |
| shTERT 2 vs. shTERT 3 + TERT WT           | -0.02198   | -0.02725 to -0.01671  | Yes          | ****    |  |
| shTERT 2 vs. shTERT 3 + TERT DN           | -0.01561   | -0.02088 to -0.01034  | Yes          | ****    |  |
| shTERT 3 vs. shTERT 3 + TERT WT           | -0.006635  | -0.01190 to -0.00137  | Yes          | **      |  |
| shTERT 3 vs. shTERT 3 + TERT DN           | -0.000269  | -0.005537 to 0.00500  | No           | ns      |  |
| shTERT 3 + TERT WT vs. shTERT 3 + TERT DN | 0.006366   | 0.001098 to 0.01163   | Yes          | *       |  |
|                                           |            |                       |              |         |  |
|                                           |            |                       |              |         |  |
|                                           |            |                       |              |         |  |
| Symbol                                    | Meaning    |                       |              |         |  |
| ns                                        | P > 0.05   |                       |              |         |  |
| *                                         | P ≤ 0.05   |                       |              |         |  |
| **                                        | P ≤ 0.01   |                       |              |         |  |
| ***                                       | P ≤ 0.001  |                       |              |         |  |
| ****                                      | P ≤ 0.0001 |                       |              |         |  |





|                                                         |               |                    |              |              |                      |
|---------------------------------------------------------|---------------|--------------------|--------------|--------------|----------------------|
| 5.8s                                                    |               |                    |              |              |                      |
| ANOVA summary                                           |               |                    |              |              |                      |
| F                                                       | 103.9         |                    |              |              |                      |
| P value                                                 | < 0.0001      |                    |              |              |                      |
| P value summary                                         | ****          |                    |              |              |                      |
| Are differences among means statistically significant?  | Yes           |                    |              |              |                      |
| R square                                                | 0.9468        |                    |              |              |                      |
| Brown-Forsythe test                                     |               |                    |              |              |                      |
| F (DFn, DFd)                                            | 2.689 (6, 35) |                    |              |              |                      |
| P value                                                 | 0.0298        |                    |              |              |                      |
| P value summary                                         | *             |                    |              |              |                      |
| Significantly different standard deviations? (P < 0.05) | Yes           |                    |              |              |                      |
| Bartlett's test                                         |               |                    |              |              |                      |
| Bartlett's statistic (corrected)                        | 40.16         |                    |              |              |                      |
| P value                                                 | < 0.0001      |                    |              |              |                      |
| P value summary                                         | ****          |                    |              |              |                      |
| Significantly different standard deviations? (P < 0.05) | Yes           |                    |              |              |                      |
| ANOVA table                                             | SS            | DF                 | MS           | F (DFn, DFd) | P value              |
| Treatment (between columns)                             | 4.555         |                    | 6            | 0.7592       | F (6, 35) = 0.007308 |
| Residual (within columns)                               | 0.2558        |                    | 35           | 0.007308     |                      |
| Total                                                   | 4.811         |                    | 41           |              |                      |
| Data summary                                            |               |                    |              |              |                      |
| Number of treatments (columns)                          | 7             |                    |              |              |                      |
| Number of values (total)                                | 42            |                    |              |              |                      |
| Number of families                                      | 1             |                    |              |              |                      |
| Number of comparisons per family                        | 21            |                    |              |              |                      |
| Alpha                                                   | 0.05          |                    |              |              |                      |
| Tukey's multiple comparisons test                       | Mean Diff.    | 95% CI of diff.    | Significant? | Summary      |                      |
| shControl vs. shTerc                                    | 0.1395        | -0.01481 to 0.2938 | No           | ns           |                      |
| shControl vs. shTERT 1                                  | 0.7017        | 0.5474 to 0.8560   | Yes          | ****         |                      |
| shControl vs. shTERT 2                                  | 0.6847        | 0.5305 to 0.8390   | Yes          | ****         |                      |
| shControl vs. shTERT 3                                  | 0.3528        | 0.1985 to 0.5071   | Yes          | ****         |                      |
| shControl vs. shTERT 3 + TERT WT                        | -0.2722       | -0.4265 to -0.1179 | Yes          | ****         |                      |
| shControl vs. shTERT 3 + TERT DN                        | 0.1598        | 0.005553 to 0.314  | Yes          | *            |                      |
| shTerc vs. shTERT 1                                     | 0.5623        | 0.4080 to 0.7165   | Yes          | ****         |                      |
| shTerc vs. shTERT 2                                     | 0.5453        | 0.3910 to 0.6996   | Yes          | ****         |                      |
| shTerc vs. shTERT 3                                     | 0.2133        | 0.05902 to 0.3676  | Yes          | **           |                      |
| shTerc vs. shTERT 3 + TERT WT                           | -0.4117       | -0.5660 to -0.2574 | Yes          | ****         |                      |
| shTerc vs. shTERT 3 + TERT DN                           | 0.02037       | -0.1339 to 0.1747  | No           | ns           |                      |
| shTERT 1 vs. shTERT 2                                   | -0.01699      | -0.1713 to 0.1373  | No           | ns           |                      |
| shTERT 1 vs. shTERT 3                                   | -0.349        | -0.5032 to -0.1947 | Yes          | ****         |                      |
| shTERT 1 vs. shTERT 3 + TERT WT                         | -0.974        | -1.128 to -0.8197  | Yes          | ****         |                      |
| shTERT 1 vs. shTERT 3 + TERT DN                         | -0.5419       | -0.6962 to -0.3876 | Yes          | ****         |                      |
| shTERT 2 vs. shTERT 3                                   | -0.332        | -0.4863 to -0.1777 | Yes          | ****         |                      |
| shTERT 2 vs. shTERT 3 + TERT WT                         | -0.957        | -1.111 to -0.8027  | Yes          | ****         |                      |
| shTERT 2 vs. shTERT 3 + TERT DN                         | -0.5249       | -0.6792 to -0.3706 | Yes          | ****         |                      |
| shTERT 3 vs. shTERT 3 + TERT WT                         | -0.625        | -0.7793 to -0.4707 | Yes          | ****         |                      |
| shTERT 3 vs. shTERT 3 + TERT DN                         | -0.1929       | -0.3472 to -0.0386 | Yes          | **           |                      |
| shTERT 3 + TERT WT vs. shTERT 3 + TERT DN               | 0.4321        | 0.2778 to 0.5864   | Yes          | ****         |                      |
| Symbol                                                  | Meaning       |                    |              |              |                      |
| ns                                                      | P > 0.05      |                    |              |              |                      |
| *                                                       | P ≤ 0.05      |                    |              |              |                      |
| **                                                      | P ≤ 0.01      |                    |              |              |                      |
| ***                                                     | P ≤ 0.001     |                    |              |              |                      |
| ****                                                    | P ≤ 0.0001    |                    |              |              |                      |





|                                                                   |               |                     |              |               |            |  |
|-------------------------------------------------------------------|---------------|---------------------|--------------|---------------|------------|--|
| Nucleolin                                                         |               |                     |              |               |            |  |
| ANOVA summary                                                     |               |                     |              |               |            |  |
| F                                                                 | 464.2         |                     |              |               |            |  |
| P value                                                           | < 0.0001      |                     |              |               |            |  |
| P value summary                                                   | ****          |                     |              |               |            |  |
| Are differences among means statistically significant? (P < 0.05) | Yes           |                     |              |               |            |  |
| R square                                                          | 0.9876        |                     |              |               |            |  |
| Brown-Forsythe test                                               |               |                     |              |               |            |  |
| F (DFn, DFd)                                                      | 3.444 (6, 35) |                     |              |               |            |  |
| P value                                                           | 0.0089        |                     |              |               |            |  |
| P value summary                                                   | **            |                     |              |               |            |  |
| Significantly different standard deviations? (P < 0.05)           | Yes           |                     |              |               |            |  |
| Bartlett's test                                                   |               |                     |              |               |            |  |
| Bartlett's statistic (corrected)                                  | 25.04         |                     |              |               |            |  |
| P value                                                           | 0.0003        |                     |              |               |            |  |
| P value summary                                                   | ***           |                     |              |               |            |  |
| Significantly different standard deviations? (P < 0.05)           | Yes           |                     |              |               |            |  |
| ANOVA table                                                       | SS            | DF                  | MS           | F (DFn, DFd)  | P value    |  |
| Treatment (between columns)                                       | 5.624         | 6                   | 0.9374       | F (6, 35) = 4 | P < 0.0001 |  |
| Residual (within columns)                                         | 0.07068       | 35                  | 0.002019     |               |            |  |
| Total                                                             | 5.695         | 41                  |              |               |            |  |
| Data summary                                                      |               |                     |              |               |            |  |
| Number of treatments (columns)                                    | 7             |                     |              |               |            |  |
| Number of values (total)                                          | 42            |                     |              |               |            |  |
| Number of families                                                | 1             |                     |              |               |            |  |
| Number of comparisons per family                                  | 21            |                     |              |               |            |  |
| Alpha                                                             | 0.05          |                     |              |               |            |  |
| Tukey's multiple comparisons test                                 | Mean Diff.    | 95% CI of d         | Significant? | Summary       |            |  |
| shControl vs. shTerc                                              | 0.09781       | 0.01671 to 0.17891  | Yes          | **            |            |  |
| shControl vs. shTERT 1                                            | 0.7376        | 0.6565 to 0.8187    | Yes          | ****          |            |  |
| shControl vs. shTERT 2                                            | 0.7525        | 0.6714 to 0.8336    | Yes          | ****          |            |  |
| shControl vs. shTERT 3                                            | 0.6891        | 0.6080 to 0.7702    | Yes          | ****          |            |  |
| shControl vs. shTERT 3 + TERT WT                                  | -0.2041       | -0.2852 to -0.1230  | Yes          | ****          |            |  |
| shControl vs. shTERT 3 + TERT DN                                  | 0.2038        | 0.1227 to 0.2849    | Yes          | ****          |            |  |
| shTerc vs. shTERT 1                                               | 0.6397        | 0.5586 to 0.7208    | Yes          | ****          |            |  |
| shTerc vs. shTERT 2                                               | 0.6546        | 0.5735 to 0.7357    | Yes          | ****          |            |  |
| shTerc vs. shTERT 3                                               | 0.5913        | 0.5102 to 0.6724    | Yes          | ****          |            |  |
| shTerc vs. shTERT 3 + TERT WT                                     | -0.3019       | -0.3830 to -0.2208  | Yes          | ****          |            |  |
| shTerc vs. shTERT 3 + TERT DN                                     | 0.106         | 0.02486 to 0.18714  | Yes          | **            |            |  |
| shTERT 1 vs. shTERT 2                                             | 0.0149        | -0.06620 to 0.09630 | No           | ns            |            |  |
| shTERT 1 vs. shTERT 3                                             | -0.04842      | -0.1295 to 0.03266  | No           | ns            |            |  |
| shTERT 1 vs. shTERT 3 + TERT WT                                   | -0.9417       | -1.023 to -0.8604   | Yes          | ****          |            |  |
| shTERT 1 vs. shTERT 3 + TERT DN                                   | -0.5338       | -0.6149 to -0.4527  | Yes          | ****          |            |  |
| shTERT 2 vs. shTERT 3                                             | -0.06332      | -0.1444 to 0.01776  | No           | ns            |            |  |
| shTERT 2 vs. shTERT 3 + TERT WT                                   | -0.9566       | -1.038 to -0.8752   | Yes          | ****          |            |  |
| shTERT 2 vs. shTERT 3 + TERT DN                                   | -0.5487       | -0.6298 to -0.4676  | Yes          | ****          |            |  |
| shTERT 3 vs. shTERT 3 + TERT WT                                   | -0.8932       | -0.9743 to -0.8121  | Yes          | ****          |            |  |
| shTERT 3 vs. shTERT 3 + TERT DN                                   | -0.4854       | -0.5665 to -0.4043  | Yes          | ****          |            |  |
| shTERT 3 + TERT WT vs. shTERT 3 + TERT DN                         | 0.4079        | 0.3268 to 0.4890    | Yes          | ****          |            |  |
|                                                                   |               |                     |              |               |            |  |
|                                                                   |               |                     |              |               |            |  |
|                                                                   |               |                     |              |               |            |  |
| Symbol                                                            | Meaning       |                     |              |               |            |  |
| ns                                                                | P > 0.05      |                     |              |               |            |  |
| *                                                                 | P ≤ 0.05      |                     |              |               |            |  |
| **                                                                | P ≤ 0.01      |                     |              |               |            |  |
| ***                                                               | P ≤ 0.001     |                     |              |               |            |  |
| ****                                                              | P ≤ 0.0001    |                     |              |               |            |  |

| Statistics for Figure S3J                                         |               |                     |              |              |                   |
|-------------------------------------------------------------------|---------------|---------------------|--------------|--------------|-------------------|
| ENO1                                                              |               |                     |              |              |                   |
| ANOVA summary                                                     |               |                     |              |              |                   |
| F                                                                 | 22.27         |                     |              |              |                   |
| P value                                                           | < 0.0001      |                     |              |              |                   |
| P value summary                                                   | ****          |                     |              |              |                   |
| Are differences among means statistically significant? (P < 0.05) | Yes           |                     |              |              |                   |
| R square                                                          | 0.8991        |                     |              |              |                   |
| Brown-Forsythe test                                               |               |                     |              |              |                   |
| F (DFn, DFd)                                                      | 1.941 (4, 10) |                     |              |              |                   |
| P value                                                           | 0.1801        |                     |              |              |                   |
| P value summary                                                   | ns            |                     |              |              |                   |
| Significantly different standard deviations? (P < 0.05)           | No            |                     |              |              |                   |
| Bartlett's test                                                   |               |                     |              |              |                   |
| Bartlett's statistic (corrected)                                  |               |                     |              |              |                   |
| P value                                                           |               |                     |              |              |                   |
| P value summary                                                   |               |                     |              |              |                   |
| Significantly different standard deviations? (P < 0.05)           |               |                     |              |              |                   |
| ANOVA table                                                       | SS            | DF                  | MS           | F (DFn, DFd) | P value           |
| Treatment (between columns)                                       | 1.51          |                     | 4            | 0.3776       | F (4, 10) = 22.27 |
| Residual (within columns)                                         | 0.1695        |                     | 10           | 0.01695      |                   |
| Total                                                             | 1.68          |                     | 14           |              |                   |
| Data summary                                                      |               |                     |              |              |                   |
| Number of treatments (columns)                                    | 5             |                     |              |              |                   |
| Number of values (total)                                          | 15            |                     |              |              |                   |
| Number of families                                                | 1             |                     |              |              |                   |
| Number of comparisons per family                                  | 10            |                     |              |              |                   |
| Alpha                                                             | 0.05          |                     |              |              |                   |
| Tukey's multiple comparisons test                                 | Mean Diff.    | 95% CI of diff.     | Significant? | Summary      |                   |
| shControl vs. shTERT-A                                            | 0.3277        | -0.02213 to 0.6776  | No           | ns           |                   |
| shControl vs. shTERT-B                                            | 0.6004        | 0.2505 to 0.9502    | Yes          | **           |                   |
| shControl vs. shTERT-A +TERT                                      | -0.1937       | -0.5436 to 0.1561   | No           | ns           |                   |
| shControl vs. shTERT-B +TERT                                      | -0.224        | -0.5738 to 0.1259   | No           | ns           |                   |
| shTERT-A vs. shTERT-B                                             | 0.2726        | -0.07724 to 0.6225  | No           | ns           |                   |
| shTERT-A vs. shTERT-A +TERT                                       | -0.5215       | -0.8713 to -0.1716  | Yes          | **           |                   |
| shTERT-A vs. shTERT-B +TERT                                       | -0.5517       | -0.9016 to -0.2019  | Yes          | **           |                   |
| shTERT-B vs. shTERT-A +TERT                                       | -0.7941       | -1.144 to -0.4442   | Yes          | ***          |                   |
| shTERT-B vs. shTERT-B +TERT                                       | -0.8243       | -1.174 to -0.4745   | Yes          | ***          |                   |
| shTERT-A +TERT vs. shTERT-B +TERT                                 | -0.03024      | -0.3801 to 0.3196   | No           | ns           |                   |
| GAPDH                                                             |               |                     |              |              |                   |
| ANOVA summary                                                     |               |                     |              |              |                   |
| F                                                                 | 25.59         |                     |              |              |                   |
| P value                                                           | < 0.0001      |                     |              |              |                   |
| P value summary                                                   | ****          |                     |              |              |                   |
| Are differences among means statistically significant? (P < 0.05) | Yes           |                     |              |              |                   |
| R square                                                          | 0.911         |                     |              |              |                   |
| Brown-Forsythe test                                               |               |                     |              |              |                   |
| F (DFn, DFd)                                                      | 2.065 (4, 10) |                     |              |              |                   |
| P value                                                           | 0.1607        |                     |              |              |                   |
| P value summary                                                   | ns            |                     |              |              |                   |
| Significantly different standard deviations? (P < 0.05)           | No            |                     |              |              |                   |
| Bartlett's test                                                   |               |                     |              |              |                   |
| Bartlett's statistic (corrected)                                  |               |                     |              |              |                   |
| P value                                                           |               |                     |              |              |                   |
| P value summary                                                   |               |                     |              |              |                   |
| Significantly different standard deviations? (P < 0.05)           |               |                     |              |              |                   |
| ANOVA table                                                       | SS            | DF                  | MS           | F (DFn, DFd) | P value           |
| Treatment (between columns)                                       | 2.339         |                     | 4            | 0.5846       | F (4, 10) = 25.59 |
| Residual (within columns)                                         | 0.2285        |                     | 10           | 0.02285      |                   |
| Total                                                             | 2.567         |                     | 14           |              |                   |
| Data summary                                                      |               |                     |              |              |                   |
| Number of treatments (columns)                                    | 5             |                     |              |              |                   |
| Number of values (total)                                          | 15            |                     |              |              |                   |
| Number of families                                                | 1             |                     |              |              |                   |
| Number of comparisons per family                                  | 10            |                     |              |              |                   |
| Alpha                                                             | 0.05          |                     |              |              |                   |
| Tukey's multiple comparisons test                                 | Mean Diff.    | 95% CI of diff.     | Significant? | Summary      |                   |
| shControl vs. shTERT-A                                            | 0.4051        | -0.001103 to 0.8112 | No           | ns           |                   |

|                                                                   |               |                     |              |                   |            |  |
|-------------------------------------------------------------------|---------------|---------------------|--------------|-------------------|------------|--|
| shControl vs. shTERT-B                                            | 0.5333        | 0.1272 to 0.9395    | Yes          | *                 |            |  |
| shControl vs. shTERT-A +TERT                                      | -0.4203       | -0.8265 to -0.01417 | Yes          | *                 |            |  |
| shControl vs. shTERT-B +TERT                                      | -0.3966       | -0.8027 to 0.009606 | No           | ns                |            |  |
| shTERT-A vs. shTERT-B                                             | 0.1283        | -0.2779 to 0.5344   | No           | ns                |            |  |
| shTERT-A vs. shTERT-A +TERT                                       | -0.8254       | -1.232 to -0.4192   | Yes          | ***               |            |  |
| shTERT-A vs. shTERT-B +TERT                                       | -0.8016       | -1.208 to -0.3955   | Yes          | ***               |            |  |
| shTERT-B vs. shTERT-A +TERT                                       | -0.9537       | -1.360 to -0.5475   | Yes          | ***               |            |  |
| shTERT-B vs. shTERT-B +TERT                                       | -0.9299       | -1.336 to -0.5237   | Yes          | ***               |            |  |
| shTERT-A +TERT vs. shTERT-B +TERT                                 | 0.02377       | -0.3824 to 0.4299   | No           | ns                |            |  |
|                                                                   |               |                     |              |                   |            |  |
|                                                                   |               |                     |              |                   |            |  |
| LDHA                                                              |               |                     |              |                   |            |  |
|                                                                   |               |                     |              |                   |            |  |
| ANOVA summary                                                     |               |                     |              |                   |            |  |
| F                                                                 | 21.76         |                     |              |                   |            |  |
| P value                                                           | < 0.0001      |                     |              |                   |            |  |
| P value summary                                                   | ****          |                     |              |                   |            |  |
| Are differences among means statistically significant? (P < 0.05) | Yes           |                     |              |                   |            |  |
| R square                                                          | 0.897         |                     |              |                   |            |  |
|                                                                   |               |                     |              |                   |            |  |
| Brown-Forsythe test                                               |               |                     |              |                   |            |  |
| F (DFn, DFd)                                                      | 1.079 (4, 10) |                     |              |                   |            |  |
| P value                                                           | 0.4171        |                     |              |                   |            |  |
| P value summary                                                   | ns            |                     |              |                   |            |  |
| Significantly different standard deviations? (P < 0.05)           | No            |                     |              |                   |            |  |
|                                                                   |               |                     |              |                   |            |  |
| Bartlett's test                                                   |               |                     |              |                   |            |  |
| Bartlett's statistic (corrected)                                  |               |                     |              |                   |            |  |
| P value                                                           |               |                     |              |                   |            |  |
| P value summary                                                   |               |                     |              |                   |            |  |
| Significantly different standard deviations? (P < 0.05)           |               |                     |              |                   |            |  |
|                                                                   |               |                     |              |                   |            |  |
| ANOVA table                                                       | SS            | DF                  | MS           | F (DFn, DFd)      | P value    |  |
| Treatment (between columns)                                       | 1.292         |                     | 4 0.3229     | F (4, 10) = 21.76 | P < 0.0001 |  |
| Residual (within columns)                                         | 0.1484        |                     | 10 0.01484   |                   |            |  |
| Total                                                             | 1.44          |                     | 14           |                   |            |  |
|                                                                   |               |                     |              |                   |            |  |
| Data summary                                                      |               |                     |              |                   |            |  |
| Number of treatments (columns)                                    | 5             |                     |              |                   |            |  |
| Number of values (total)                                          | 15            |                     |              |                   |            |  |
|                                                                   |               |                     |              |                   |            |  |
| Number of families                                                | 1             |                     |              |                   |            |  |
| Number of comparisons per family                                  | 10            |                     |              |                   |            |  |
| Alpha                                                             | 0.05          |                     |              |                   |            |  |
|                                                                   |               |                     |              |                   |            |  |
| Tukey's multiple comparisons test                                 | Mean Diff.    | 95% CI of diff.     | Significant? | Summary           |            |  |
|                                                                   |               |                     |              |                   |            |  |
| shControl vs. shTERT-A                                            | 0.4054        | 0.07808 to 0.7327   | Yes          | *                 |            |  |
| shControl vs. shTERT-B                                            | 0.4699        | 0.1426 to 0.7973    | Yes          | **                |            |  |
| shControl vs. shTERT-A +TERT                                      | -0.2933       | -0.6206 to 0.03401  | No           | ns                |            |  |
| shControl vs. shTERT-B +TERT                                      | -0.08896      | -0.4163 to 0.2383   | No           | ns                |            |  |
| shTERT-A vs. shTERT-B                                             | 0.06456       | -0.2627 to 0.3919   | No           | ns                |            |  |
| shTERT-A vs. shTERT-A +TERT                                       | -0.6987       | -1.026 to -0.3714   | Yes          | ***               |            |  |
| shTERT-A vs. shTERT-B +TERT                                       | -0.4943       | -0.8217 to -0.1670  | Yes          | **                |            |  |
| shTERT-B vs. shTERT-A +TERT                                       | -0.7632       | -1.091 to -0.4359   | Yes          | ***               |            |  |
| shTERT-B vs. shTERT-B +TERT                                       | -0.5589       | -0.8862 to -0.2316  | Yes          | **                |            |  |
| shTERT-A +TERT vs. shTERT-B +TERT                                 | 0.2043        | -0.1230 to 0.5316   | No           | ns                |            |  |
|                                                                   |               |                     |              |                   |            |  |
|                                                                   |               |                     |              |                   |            |  |
| PKM2                                                              |               |                     |              |                   |            |  |
|                                                                   |               |                     |              |                   |            |  |
| ANOVA summary                                                     |               |                     |              |                   |            |  |
| F                                                                 | 21.66         |                     |              |                   |            |  |
| P value                                                           | < 0.0001      |                     |              |                   |            |  |
| P value summary                                                   | ****          |                     |              |                   |            |  |
| Are differences among means statistically significant? (P < 0.05) | Yes           |                     |              |                   |            |  |
| R square                                                          | 0.8965        |                     |              |                   |            |  |
|                                                                   |               |                     |              |                   |            |  |
| Brown-Forsythe test                                               |               |                     |              |                   |            |  |
| F (DFn, DFd)                                                      | 1.137 (4, 10) |                     |              |                   |            |  |
| P value                                                           | 0.3932        |                     |              |                   |            |  |
| P value summary                                                   | ns            |                     |              |                   |            |  |
| Significantly different standard deviations? (P < 0.05)           | No            |                     |              |                   |            |  |
|                                                                   |               |                     |              |                   |            |  |
| Bartlett's test                                                   |               |                     |              |                   |            |  |
| Bartlett's statistic (corrected)                                  |               |                     |              |                   |            |  |
| P value                                                           |               |                     |              |                   |            |  |
| P value summary                                                   |               |                     |              |                   |            |  |
| Significantly different standard deviations? (P < 0.05)           |               |                     |              |                   |            |  |
|                                                                   |               |                     |              |                   |            |  |
| ANOVA table                                                       | SS            | DF                  | MS           | F (DFn, DFd)      | P value    |  |
| Treatment (between columns)                                       | 1.2           |                     | 4 0.3        | F (4, 10) = 21.66 | P < 0.0001 |  |
| Residual (within columns)                                         | 0.1385        |                     | 10 0.01385   |                   |            |  |
| Total                                                             | 1.339         |                     | 14           |                   |            |  |
|                                                                   |               |                     |              |                   |            |  |
| Data summary                                                      |               |                     |              |                   |            |  |
| Number of treatments (columns)                                    | 5             |                     |              |                   |            |  |

|                                                                   |                |                    |              |                   |            |
|-------------------------------------------------------------------|----------------|--------------------|--------------|-------------------|------------|
| Number of values (total)                                          | 15             |                    |              |                   |            |
| Number of families                                                | 1              |                    |              |                   |            |
| Number of comparisons per family                                  | 10             |                    |              |                   |            |
| Alpha                                                             | 0.05           |                    |              |                   |            |
| Tukey's multiple comparisons test                                 | Mean Diff.     | 95% CI of diff.    | Significant? | Summary           |            |
| shControl vs. shTERT-A                                            | 0.3533         | 0.03699 to 0.6695  | Yes          | *                 |            |
| shControl vs. shTERT-B                                            | 0.4049         | 0.08862 to 0.7212  | Yes          | *                 |            |
| shControl vs. shTERT-A +TERT                                      | -0.2754        | -0.5917 to 0.04084 | No           | ns                |            |
| shControl vs. shTERT-B +TERT                                      | -0.2215        | -0.5378 to 0.09474 | No           | ns                |            |
| shTERT-A vs. shTERT-B                                             | 0.05162        | -0.2646 to 0.3679  | No           | ns                |            |
| shTERT-A vs. shTERT-A +TERT                                       | -0.6287        | -0.9450 to -0.3124 | Yes          | ***               |            |
| shTERT-A vs. shTERT-B +TERT                                       | -0.5748        | -0.8911 to -0.2585 | Yes          | ***               |            |
| shTERT-B vs. shTERT-A +TERT                                       | -0.6803        | -0.9966 to -0.3640 | Yes          | ***               |            |
| shTERT-B vs. shTERT-B +TERT                                       | -0.6264        | -0.9427 to -0.3101 | Yes          | ***               |            |
| shTERT-A +TERT vs. shTERT-B +TERT                                 | 0.0539         | -0.2624 to 0.3702  | No           | ns                |            |
|                                                                   |                |                    |              |                   |            |
| EXOSC2                                                            |                |                    |              |                   |            |
| ANOVA summary                                                     |                |                    |              |                   |            |
| F                                                                 | 45.94          |                    |              |                   |            |
| P value                                                           | < 0.0001       |                    |              |                   |            |
| P value summary                                                   | ****           |                    |              |                   |            |
| Are differences among means statistically significant? (P < 0.05) | Yes            |                    |              |                   |            |
| R square                                                          | 0.9484         |                    |              |                   |            |
|                                                                   |                |                    |              |                   |            |
| Brown-Forsythe test                                               |                |                    |              |                   |            |
| F (DFn, DFd)                                                      | 0.9306 (4, 10) |                    |              |                   |            |
| P value                                                           | 0.4843         |                    |              |                   |            |
| P value summary                                                   | ns             |                    |              |                   |            |
| Significantly different standard deviations? (P < 0.05)           | No             |                    |              |                   |            |
|                                                                   |                |                    |              |                   |            |
| Bartlett's test                                                   |                |                    |              |                   |            |
| Bartlett's statistic (corrected)                                  |                |                    |              |                   |            |
| P value                                                           |                |                    |              |                   |            |
| P value summary                                                   |                |                    |              |                   |            |
| Significantly different standard deviations? (P < 0.05)           |                |                    |              |                   |            |
|                                                                   |                |                    |              |                   |            |
| ANOVA table                                                       | SS             | DF                 | MS           | F (DFn, DFd)      | P value    |
| Treatment (between columns)                                       | 0.6278         | 4                  | 0.157        | F (4, 10) = 45.94 | P < 0.0001 |
| Residual (within columns)                                         | 0.03416        | 10                 | 0.003416     |                   |            |
| Total                                                             | 0.662          | 14                 |              |                   |            |
|                                                                   |                |                    |              |                   |            |
| Data summary                                                      |                |                    |              |                   |            |
| Number of treatments (columns)                                    | 5              |                    |              |                   |            |
| Number of values (total)                                          | 15             |                    |              |                   |            |
|                                                                   |                |                    |              |                   |            |
| Number of families                                                | 1              |                    |              |                   |            |
| Number of comparisons per family                                  | 10             |                    |              |                   |            |
| Alpha                                                             | 0.05           |                    |              |                   |            |
| Tukey's multiple comparisons test                                 | Mean Diff.     | 95% CI of diff.    | Significant? | Summary           |            |
| shControl vs. shTERT-A                                            | 0.3257         | 0.1687 to 0.4828   | Yes          | ***               |            |
| shControl vs. shTERT-B                                            | 0.3843         | 0.2272 to 0.5413   | Yes          | ****              |            |
| shControl vs. shTERT-A +TERT                                      | -0.128         | -0.2851 to 0.02906 | No           | ns                |            |
| shControl vs. shTERT-B +TERT                                      | -0.02698       | -0.1840 to 0.1301  | No           | ns                |            |
| shTERT-A vs. shTERT-B                                             | 0.05855        | -0.09851 to 0.2156 | No           | ns                |            |
| shTERT-A vs. shTERT-A +TERT                                       | -0.4537        | -0.6108 to -0.2967 | Yes          | ****              |            |
| shTERT-A vs. shTERT-B +TERT                                       | -0.3527        | -0.5098 to -0.1956 | Yes          | ***               |            |
| shTERT-B vs. shTERT-A +TERT                                       | -0.5123        | -0.6693 to -0.3552 | Yes          | ****              |            |
| shTERT-B vs. shTERT-B +TERT                                       | -0.4113        | -0.5683 to -0.2542 | Yes          | ****              |            |
| shTERT-A +TERT vs. shTERT-B +TERT                                 | 0.101          | -0.05604 to 0.2581 | No           | ns                |            |
|                                                                   |                |                    |              |                   |            |
| MCM6                                                              |                |                    |              |                   |            |
| ANOVA summary                                                     |                |                    |              |                   |            |
| F                                                                 | 7.248          |                    |              |                   |            |
| P value                                                           | 0.0052         |                    |              |                   |            |
| P value summary                                                   | **             |                    |              |                   |            |
| Are differences among means statistically significant? (P < 0.05) | Yes            |                    |              |                   |            |
| R square                                                          | 0.7435         |                    |              |                   |            |
|                                                                   |                |                    |              |                   |            |
| Brown-Forsythe test                                               |                |                    |              |                   |            |
| F (DFn, DFd)                                                      | 1.198 (4, 10)  |                    |              |                   |            |
| P value                                                           | 0.3699         |                    |              |                   |            |
| P value summary                                                   | ns             |                    |              |                   |            |
| Significantly different standard deviations? (P < 0.05)           | No             |                    |              |                   |            |
|                                                                   |                |                    |              |                   |            |
| Bartlett's test                                                   |                |                    |              |                   |            |
| Bartlett's statistic (corrected)                                  |                |                    |              |                   |            |
| P value                                                           |                |                    |              |                   |            |
| P value summary                                                   |                |                    |              |                   |            |



|                                                                   |               |                     |              |              |                   |
|-------------------------------------------------------------------|---------------|---------------------|--------------|--------------|-------------------|
| Significantly different standard deviations? (P < 0.05)           |               |                     |              |              |                   |
| ANOVA table                                                       | SS            | DF                  | MS           | F (DFn, DFd) | P value           |
| Treatment (between columns)                                       | 0.6358        |                     | 4            | 0.1589       | F (4, 10) = 7.248 |
| Residual (within columns)                                         | 0.2193        |                     | 10           | 0.02193      |                   |
| Total                                                             | 0.8551        |                     | 14           |              |                   |
| Data summary                                                      |               |                     |              |              |                   |
| Number of treatments (columns)                                    | 5             |                     |              |              |                   |
| Number of values (total)                                          | 15            |                     |              |              |                   |
| Number of families                                                | 1             |                     |              |              |                   |
| Number of comparisons per family                                  | 10            |                     |              |              |                   |
| Alpha                                                             | 0.05          |                     |              |              |                   |
| Tukey's multiple comparisons test                                 | Mean Diff.    | 95% CI of diff.     | Significant? | Summary      |                   |
| shControl vs. shTERT-A                                            | 0.2131        | -0.1848 to 0.6111   | No           | ns           |                   |
| shControl vs. shTERT-B                                            | 0.4103        | 0.01237 to 0.8083   | Yes          | *            |                   |
| shControl vs. shTERT-A +TERT                                      | -0.1781       | -0.5760 to 0.2199   | No           | ns           |                   |
| shControl vs. shTERT-B +TERT                                      | -0.03014      | -0.4281 to 0.3678   | No           | ns           |                   |
| shTERT-A vs. shTERT-B                                             | 0.1972        | -0.2008 to 0.5951   | No           | ns           |                   |
| shTERT-A vs. shTERT-A +TERT                                       | -0.3912       | -0.7892 to 0.006713 | No           | ns           |                   |
| shTERT-A vs. shTERT-B +TERT                                       | -0.2433       | -0.6412 to 0.1547   | No           | ns           |                   |
| shTERT-B vs. shTERT-A +TERT                                       | -0.5884       | -0.9863 to -0.1905  | Yes          | **           |                   |
| shTERT-B vs. shTERT-B +TERT                                       | -0.4405       | -0.8384 to -0.04251 | Yes          | *            |                   |
| shTERT-A +TERT vs. shTERT-B +TERT                                 | 0.1479        | -0.2500 to 0.5459   | No           | ns           |                   |
| MYBBP1A                                                           |               |                     |              |              |                   |
| ANOVA summary                                                     |               |                     |              |              |                   |
| F                                                                 | 11.51         |                     |              |              |                   |
| P value                                                           | 0.0009        |                     |              |              |                   |
| P value summary                                                   | ***           |                     |              |              |                   |
| Are differences among means statistically significant? (P < 0.05) | Yes           |                     |              |              |                   |
| R square                                                          | 0.8215        |                     |              |              |                   |
| Brown-Forsythe test                                               |               |                     |              |              |                   |
| F (DFn, DFd)                                                      | 2.284 (4, 10) |                     |              |              |                   |
| P value                                                           | 0.132         |                     |              |              |                   |
| P value summary                                                   | ns            |                     |              |              |                   |
| Significantly different standard deviations? (P < 0.05)           | No            |                     |              |              |                   |
| Bartlett's test                                                   |               |                     |              |              |                   |
| Bartlett's statistic (corrected)                                  |               |                     |              |              |                   |
| P value                                                           |               |                     |              |              |                   |
| P value summary                                                   |               |                     |              |              |                   |
| Significantly different standard deviations? (P < 0.05)           |               |                     |              |              |                   |
| ANOVA table                                                       | SS            | DF                  | MS           | F (DFn, DFd) | P value           |
| Treatment (between columns)                                       | 0.9369        |                     | 4            | 0.2342       | F (4, 10) = 11.51 |
| Residual (within columns)                                         | 0.2036        |                     | 10           | 0.02036      |                   |
| Total                                                             | 1.14          |                     | 14           |              |                   |
| Data summary                                                      |               |                     |              |              |                   |
| Number of treatments (columns)                                    | 5             |                     |              |              |                   |
| Number of values (total)                                          | 15            |                     |              |              |                   |
| Number of families                                                | 1             |                     |              |              |                   |
| Number of comparisons per family                                  | 10            |                     |              |              |                   |
| Alpha                                                             | 0.05          |                     |              |              |                   |
| Tukey's multiple comparisons test                                 | Mean Diff.    | 95% CI of diff.     | Significant? | Summary      |                   |
| shControl vs. shTERT-A                                            | 0.3446        | -0.03879 to 0.7280  | No           | ns           |                   |
| shControl vs. shTERT-B                                            | 0.4101        | 0.02671 to 0.7935   | Yes          | *            |                   |
| shControl vs. shTERT-A +TERT                                      | -0.1641       | -0.5475 to 0.2193   | No           | ns           |                   |
| shControl vs. shTERT-B +TERT                                      | -0.1795       | -0.5629 to 0.2039   | No           | ns           |                   |
| shTERT-A vs. shTERT-B                                             | 0.0655        | -0.3179 to 0.4489   | No           | ns           |                   |
| shTERT-A vs. shTERT-A +TERT                                       | -0.5087       | -0.8921 to -0.1253  | Yes          | **           |                   |
| shTERT-A vs. shTERT-B +TERT                                       | -0.5241       | -0.9075 to -0.1407  | Yes          | **           |                   |
| shTERT-B vs. shTERT-A +TERT                                       | -0.5742       | -0.9576 to -0.1908  | Yes          | **           |                   |
| shTERT-B vs. shTERT-B +TERT                                       | -0.5896       | -0.9730 to -0.2062  | Yes          | **           |                   |
| shTERT-A +TERT vs. shTERT-B +TERT                                 | -0.01544      | -0.3988 to 0.3679   | No           | ns           |                   |

|                                                        |               |                    |              |                   |            |    |       |    |
|--------------------------------------------------------|---------------|--------------------|--------------|-------------------|------------|----|-------|----|
| Statistics for Figure 4A                               |               |                    |              |                   |            |    |       |    |
| HK2                                                    |               |                    |              |                   |            |    |       |    |
| ANOVA summary                                          |               |                    |              |                   |            |    |       |    |
| F                                                      | 18.65         |                    |              |                   |            |    |       |    |
| P value                                                | < 0.0001      |                    |              |                   |            |    |       |    |
| P value summary                                        | ****          |                    |              |                   |            |    |       |    |
| Are differences among means statistically significant? | Yes           |                    |              |                   |            |    |       |    |
| R square                                               | 0.7132        |                    |              |                   |            |    |       |    |
| Brown-Forsythe test                                    |               |                    |              |                   |            |    |       |    |
| F (DFn, DFd)                                           | 1.445 (2, 15) |                    |              |                   |            |    |       |    |
| P value                                                | 0.2667        |                    |              |                   |            |    |       |    |
| P value summary                                        | ns            |                    |              |                   |            |    |       |    |
| Significantly different standard deviation?            | No            |                    |              |                   |            |    |       |    |
| Bartlett's test                                        |               |                    |              |                   |            |    |       |    |
| Bartlett's statistic (corrected)                       | 3.915         |                    |              |                   |            |    |       |    |
| P value                                                | 0.1412        |                    |              |                   |            |    |       |    |
| P value summary                                        | ns            |                    |              |                   |            |    |       |    |
| Significantly different standard deviation?            | No            |                    |              |                   |            |    |       |    |
| ANOVA table                                            |               |                    |              |                   |            |    |       |    |
|                                                        | SS            | DF                 | MS           | F (DFn, DFd)      | P value    |    |       |    |
| Treatment (between columns)                            | 0.4244        | 2                  | 0.2122       | F (2, 15) = 18.65 | P < 0.0001 |    |       |    |
| Residual (within columns)                              | 0.1706        | 15                 | 0.01138      |                   |            |    |       |    |
| Total                                                  | 0.595         | 17                 |              |                   |            |    |       |    |
| Data summary                                           |               |                    |              |                   |            |    |       |    |
| Number of treatments (columns)                         | 3             |                    |              |                   |            |    |       |    |
| Number of values (total)                               | 18            |                    |              |                   |            |    |       |    |
| Number of families                                     | 1             |                    |              |                   |            |    |       |    |
| Number of comparisons per family                       | 3             |                    |              |                   |            |    |       |    |
| Alpha                                                  | 0.05          |                    |              |                   |            |    |       |    |
| Tukey's multiple comparisons test                      |               |                    |              |                   |            |    |       |    |
|                                                        | Mean Diff.    | 95% CI of diff.    | Significant? | Summary           |            |    |       |    |
| shControl vs. shTERT 1                                 | 0.3758        | 0.2158 to 0.5358   | Yes          | ****              |            |    | A-B   |    |
| shControl vs. shTERT 1 + MYC                           | 0.1739        | 0.01400 to 0.3338  | Yes          | *                 |            |    | A-C   |    |
| shTERT 1 vs. shTERT 1 + MYC                            | -0.2018       | -0.3618 to -0.0418 | Yes          | *                 |            |    | B-C   |    |
| Test details                                           |               |                    |              |                   |            |    |       |    |
|                                                        | Mean 1        | Mean 2             | Mean Diff.   | SE of diff.       | n1         | n2 | q     | DF |
| shControl vs. shTERT 1                                 | 1.013         | 0.6369             | 0.3758       | 0.06158           | 6          | 6  | 8.63  | 15 |
| shControl vs. shTERT 1 + MYC                           | 1.013         | 0.8387             | 0.1739       | 0.06158           | 6          | 6  | 3.995 | 15 |
| shTERT 1 vs. shTERT 1 + MYC                            | 0.6369        | 0.8387             | -0.2018      | 0.06158           | 6          | 6  | 4.635 | 15 |
| PGK1                                                   |               |                    |              |                   |            |    |       |    |
| ANOVA summary                                          |               |                    |              |                   |            |    |       |    |
| F                                                      | 15.89         |                    |              |                   |            |    |       |    |
| P value                                                | 0.0002        |                    |              |                   |            |    |       |    |
| P value summary                                        | ***           |                    |              |                   |            |    |       |    |
| Are differences among means statistically significant? | Yes           |                    |              |                   |            |    |       |    |
| R square                                               | 0.6794        |                    |              |                   |            |    |       |    |
| Brown-Forsythe test                                    |               |                    |              |                   |            |    |       |    |
| F (DFn, DFd)                                           | 5.543 (2, 15) |                    |              |                   |            |    |       |    |
| P value                                                | 0.0158        |                    |              |                   |            |    |       |    |
| P value summary                                        | *             |                    |              |                   |            |    |       |    |
| Significantly different standard deviation?            | Yes           |                    |              |                   |            |    |       |    |
| Bartlett's test                                        |               |                    |              |                   |            |    |       |    |
| Bartlett's statistic (corrected)                       | 9.112         |                    |              |                   |            |    |       |    |
| P value                                                | 0.0105        |                    |              |                   |            |    |       |    |
| P value summary                                        | *             |                    |              |                   |            |    |       |    |
| Significantly different standard deviation?            | Yes           |                    |              |                   |            |    |       |    |

|                                            |                |               |              |               |            |    |       |  |
|--------------------------------------------|----------------|---------------|--------------|---------------|------------|----|-------|--|
| ANOVA table                                | SS             | DF            | MS           | F (DFn, DF)   | P value    |    |       |  |
| Treatment (between columns)                | 0.3994         | 2             | 0.1997       | F (2, 15) =   | P = 0.0002 |    |       |  |
| Residual (within columns)                  | 0.1885         | 15            | 0.01256      |               |            |    |       |  |
| Total                                      | 0.5878         | 17            |              |               |            |    |       |  |
| Data summary                               |                |               |              |               |            |    |       |  |
| Number of treatments (columns)             | 3              |               |              |               |            |    |       |  |
| Number of values (total)                   | 18             |               |              |               |            |    |       |  |
| Number of families                         | 1              |               |              |               |            |    |       |  |
| Number of comparisons per family           | 3              |               |              |               |            |    |       |  |
| Alpha                                      | 0.05           |               |              |               |            |    |       |  |
| Tukey's multiple comparisons test          | Mean Diff.     | 95% CI of d   | Significant? | Summary       |            |    |       |  |
| shControl vs. shTERT 1                     | 0.2902         | 0.1221 to 0   | Yes          | **            |            |    | A-B   |  |
| shControl vs. shTERT 1 + MYC               | -0.04635       | -0.2144 to 0  | No           | ns            |            |    | A-C   |  |
| shTERT 1 vs. shTERT 1 + MYC                | -0.3366        | -0.5047 to -  | Yes          | ***           |            |    | B-C   |  |
| Test details                               | Mean 1         | Mean 2        | Mean Diff.   | SE of diff.   | n1         | n2 | q     |  |
| shControl vs. shTERT 1                     | 1.002          | 0.7116        | 0.2902       | 0.06471       | 6          | 6  | 6.343 |  |
| shControl vs. shTERT 1 + MYC               | 1.002          | 1.048         | -0.04635     | 0.06471       | 6          | 6  | 1.013 |  |
| shTERT 1 vs. shTERT 1 + MYC                | 0.7116         | 1.048         | -0.3366      | 0.06471       | 6          | 6  | 7.356 |  |
| ALDOC                                      |                |               |              |               |            |    |       |  |
| ANOVA summary                              |                |               |              |               |            |    |       |  |
| F                                          | 41.82          |               |              |               |            |    |       |  |
| P value                                    | < 0.0001       |               |              |               |            |    |       |  |
| P value summary                            | ****           |               |              |               |            |    |       |  |
| Are differences among means statistic      | Yes            |               |              |               |            |    |       |  |
| R square                                   | 0.8479         |               |              |               |            |    |       |  |
| Brown-Forsythe test                        |                |               |              |               |            |    |       |  |
| F (DFn, DFd)                               | 0.8620 (2, 15) |               |              |               |            |    |       |  |
| P value                                    | 0.4422         |               |              |               |            |    |       |  |
| P value summary                            | ns             |               |              |               |            |    |       |  |
| Significantly different standard deviation | No             |               |              |               |            |    |       |  |
| Bartlett's test                            |                |               |              |               |            |    |       |  |
| Bartlett's statistic (corrected)           | 3.02           |               |              |               |            |    |       |  |
| P value                                    | 0.2209         |               |              |               |            |    |       |  |
| P value summary                            | ns             |               |              |               |            |    |       |  |
| Significantly different standard deviation | No             |               |              |               |            |    |       |  |
| ANOVA table                                | SS             | DF            | MS           | F (DFn, DF)   | P value    |    |       |  |
| Treatment (between columns)                | 0.5738         | 2             | 0.2869       | F (2, 15) = 4 | P < 0.0001 |    |       |  |
| Residual (within columns)                  | 0.1029         | 15            | 0.006861     |               |            |    |       |  |
| Total                                      | 0.6768         | 17            |              |               |            |    |       |  |
| Data summary                               |                |               |              |               |            |    |       |  |
| Number of treatments (columns)             | 3              |               |              |               |            |    |       |  |
| Number of values (total)                   | 18             |               |              |               |            |    |       |  |
| Number of families                         | 1              |               |              |               |            |    |       |  |
| Number of comparisons per family           | 3              |               |              |               |            |    |       |  |
| Alpha                                      | 0.05           |               |              |               |            |    |       |  |
| Tukey's multiple comparisons test          | Mean Diff.     | 95% CI of d   | Significant? | Summary       |            |    |       |  |
| shControl vs. shTERT 1                     | 0.3963         | 0.2721 to 0   | Yes          | ****          |            |    | A-B   |  |
| shControl vs. shTERT 1 + MYC               | 0.03803        | -0.08619 to 0 | No           | ns            |            |    | A-C   |  |
| shTERT 1 vs. shTERT 1 + MYC                | -0.3583        | -0.4825 to -  | Yes          | ****          |            |    | B-C   |  |
| Test details                               | Mean 1         | Mean 2        | Mean Diff.   | SE of diff.   | n1         | n2 |       |  |

|                                            |                |              |              |              |            |    |        |
|--------------------------------------------|----------------|--------------|--------------|--------------|------------|----|--------|
| shControl vs. shTERT 1                     | 0.9811         | 0.5848       | 0.3963       | 0.04782      | 6          | 6  |        |
| shControl vs. shTERT 1 + MYC               | 0.9811         | 0.9431       | 0.03803      | 0.04782      | 6          | 6  |        |
| shTERT 1 vs. shTERT 1 + MYC                | 0.5848         | 0.9431       | -0.3583      | 0.04782      | 6          | 6  |        |
|                                            |                |              |              |              |            |    |        |
|                                            |                |              |              |              |            |    |        |
| PKM2                                       |                |              |              |              |            |    |        |
|                                            |                |              |              |              |            |    |        |
| ANOVA summary                              |                |              |              |              |            |    |        |
| F                                          | 11.97          |              |              |              |            |    |        |
| P value                                    | 0.0009         |              |              |              |            |    |        |
| P value summary                            | ***            |              |              |              |            |    |        |
| Are differences among means statistic      | Yes            |              |              |              |            |    |        |
| R square                                   | 0.6311         |              |              |              |            |    |        |
|                                            |                |              |              |              |            |    |        |
| Brown-Forsythe test                        |                |              |              |              |            |    |        |
| F (DFn, DFd)                               | 0.7607 (2, 14) |              |              |              |            |    |        |
| P value                                    | 0.4857         |              |              |              |            |    |        |
| P value summary                            | ns             |              |              |              |            |    |        |
| Significantly different standard deviation | No             |              |              |              |            |    |        |
|                                            |                |              |              |              |            |    |        |
| Bartlett's test                            |                |              |              |              |            |    |        |
| Bartlett's statistic (corrected)           | 4.151          |              |              |              |            |    |        |
| P value                                    | 0.1255         |              |              |              |            |    |        |
| P value summary                            | ns             |              |              |              |            |    |        |
| Significantly different standard deviation | No             |              |              |              |            |    |        |
|                                            |                |              |              |              |            |    |        |
| ANOVA table                                | SS             | DF           | MS           | F (DFn, DFd) | P value    |    |        |
| Treatment (between columns)                | 0.2527         | 2            | 0.1263       | F (2, 14) =  | P = 0.0009 |    |        |
| Residual (within columns)                  | 0.1477         | 14           | 0.01055      |              |            |    |        |
| Total                                      | 0.4004         | 16           |              |              |            |    |        |
|                                            |                |              |              |              |            |    |        |
| Data summary                               |                |              |              |              |            |    |        |
| Number of treatments (columns)             | 3              |              |              |              |            |    |        |
| Number of values (total)                   | 17             |              |              |              |            |    |        |
|                                            |                |              |              |              |            |    |        |
| Number of families                         | 1              |              |              |              |            |    |        |
| Number of comparisons per family           | 3              |              |              |              |            |    |        |
| Alpha                                      | 0.05           |              |              |              |            |    |        |
|                                            |                |              |              |              |            |    |        |
| Tukey's multiple comparisons test          | Mean Diff.     | 95% CI of d  | Significant? | Summary      |            |    |        |
| shControl vs. shTERT 1                     | 0.2609         | 0.1056 to 0. | Yes          | **           |            |    | A-B    |
| shControl vs. shTERT 1 + MYC               | 0.01314        | -0.1497 to 0 | No           | ns           |            |    | A-C    |
| shTERT 1 vs. shTERT 1 + MYC                | -0.2477        | -0.4105 to - | Yes          | **           |            |    | B-C    |
|                                            |                |              |              |              |            |    |        |
|                                            |                |              |              |              |            |    |        |
| Test details                               | Mean 1         | Mean 2       | Mean Diff.   | SE of diff.  | n1         | n2 | q      |
| shControl vs. shTERT 1                     | 1.09           | 0.8295       | 0.2609       | 0.0593       | 6          | 6  | 6.22   |
| shControl vs. shTERT 1 + MYC               | 1.09           | 1.077        | 0.01314      | 0.0622       | 6          | 5  | 0.2988 |
| shTERT 1 vs. shTERT 1 + MYC                | 0.8295         | 1.077        | -0.2477      | 0.0622       | 6          | 5  | 5.632  |
|                                            |                |              |              |              |            |    |        |
|                                            |                |              |              |              |            |    |        |
| LDHA                                       |                |              |              |              |            |    |        |
|                                            |                |              |              |              |            |    |        |
| ANOVA summary                              |                |              |              |              |            |    |        |
| F                                          | 10.9           |              |              |              |            |    |        |
| P value                                    | 0.0025         |              |              |              |            |    |        |
| P value summary                            | **             |              |              |              |            |    |        |
| Are differences among means statistic      | Yes            |              |              |              |            |    |        |
| R square                                   | 0.6646         |              |              |              |            |    |        |
|                                            |                |              |              |              |            |    |        |
| Brown-Forsythe test                        |                |              |              |              |            |    |        |
| F (DFn, DFd)                               | 13.07 (2, 11)  |              |              |              |            |    |        |
| P value                                    | 0.0012         |              |              |              |            |    |        |
| P value summary                            | **             |              |              |              |            |    |        |
| Significantly different standard deviation | Yes            |              |              |              |            |    |        |
|                                            |                |              |              |              |            |    |        |
| Bartlett's test                            |                |              |              |              |            |    |        |

|                                                         |            |                    |              |               |            |    |         |     |
|---------------------------------------------------------|------------|--------------------|--------------|---------------|------------|----|---------|-----|
| Bartlett's statistic (corrected)                        |            |                    |              |               |            |    |         |     |
| P value                                                 |            |                    |              |               |            |    |         |     |
| P value summary                                         |            |                    |              |               |            |    |         |     |
| Significantly different standard deviations? (P < 0.05) |            |                    |              |               |            |    |         |     |
| ANOVA table                                             | SS         | DF                 | MS           | F (DFn, DF)   | P value    |    |         |     |
| Treatment (between columns)                             | 0.2027     | 2                  | 0.1013       | F (2, 11) = 1 | P = 0.0025 |    |         |     |
| Residual (within columns)                               | 0.1023     | 11                 | 0.009299     |               |            |    |         |     |
| Total                                                   | 0.3049     | 13                 |              |               |            |    |         |     |
| Data summary                                            |            |                    |              |               |            |    |         |     |
| Number of treatments (columns)                          | 3          |                    |              |               |            |    |         |     |
| Number of values (total)                                | 14         |                    |              |               |            |    |         |     |
| Number of families                                      | 1          |                    |              |               |            |    |         |     |
| Number of comparisons per family                        | 3          |                    |              |               |            |    |         |     |
| Alpha                                                   | 0.05       |                    |              |               |            |    |         |     |
| Tukey's multiple comparisons test                       | Mean Diff. | 95% CI of d        | Significant? | Summary       |            |    |         |     |
| shControl vs. shTERT 1                                  | 0.2437     | 0.09335 to 0.39405 | Yes          | **            |            |    |         | A-B |
| shControl vs. shTERT 1 + MYC                            | 0.002388   | -0.2103 to 0.21522 | No           | ns            |            |    |         | A-C |
| shTERT 1 vs. shTERT 1 + MYC                             | -0.2413    | -0.4540 to -0.0286 | Yes          | *             |            |    |         | B-C |
| Test details                                            | Mean 1     | Mean 2             | Mean Diff.   | SE of diff.   | n1         | n2 | q       | DF  |
| shControl vs. shTERT 1                                  | 1.013      | 0.7694             | 0.2437       | 0.05567       | 6          | 6  | 6.191   | 11  |
| shControl vs. shTERT 1 + MYC                            | 1.013      | 1.011              | 0.002388     | 0.07873       | 6          | 2  | 0.04289 | 11  |
| shTERT 1 vs. shTERT 1 + MYC                             | 0.7694     | 1.011              | -0.2413      | 0.07873       | 6          | 2  | 4.335   | 11  |

| Statistics for Figure S5G                                         |               |               |              |               |            |
|-------------------------------------------------------------------|---------------|---------------|--------------|---------------|------------|
| Cyclin D2                                                         |               |               |              |               |            |
| ANOVA summary                                                     |               |               |              |               |            |
| F                                                                 | 283.5         |               |              |               |            |
| P value                                                           | < 0.0001      |               |              |               |            |
| P value summary                                                   | ****          |               |              |               |            |
| Are differences among means statistically significant? (P < 0.05) | Yes           |               |              |               |            |
| R square                                                          | 0.9793        |               |              |               |            |
| Brown-Forsythe test                                               |               |               |              |               |            |
| F (DFn, DFd)                                                      | 7.435 (5, 30) |               |              |               |            |
| P value                                                           | 0.0001        |               |              |               |            |
| P value summary                                                   | ***           |               |              |               |            |
| Significantly different standard deviations? (P < 0.05)           | Yes           |               |              |               |            |
| Bartlett's test                                                   |               |               |              |               |            |
| Bartlett's statistic (corrected)                                  | 39.74         |               |              |               |            |
| P value                                                           | < 0.0001      |               |              |               |            |
| P value summary                                                   | ****          |               |              |               |            |
| Significantly different standard deviations? (P < 0.05)           | Yes           |               |              |               |            |
| ANOVA table                                                       |               |               |              |               |            |
|                                                                   | SS            | DF            | MS           | F (DFn, DFd)  | P value    |
| Treatment (between columns)                                       | 20.77         | 5             | 4.153        | F (5, 30) = 4 | P < 0.0001 |
| Residual (within columns)                                         | 0.4395        | 30            | 0.01465      |               |            |
| Total                                                             | 21.21         | 35            |              |               |            |
| Data summary                                                      |               |               |              |               |            |
| Number of treatments (columns)                                    | 6             |               |              |               |            |
| Number of values (total)                                          | 36            |               |              |               |            |
| Number of families                                                | 1             |               |              |               |            |
| Number of comparisons per family                                  | 15            |               |              |               |            |
| Alpha                                                             | 0.05          |               |              |               |            |
| Tukey's multiple comparisons test                                 |               |               |              |               |            |
|                                                                   | Mean Diff.    | 95% CI of d   | Significant? | Summary       |            |
| Control vs. MYC                                                   | -0.8267       | -1.039 to -0  | Yes          | ****          |            |
| Control vs. MYC MUT                                               | 0.1833        | -0.02923 to 0 | No           | ns            |            |
| Control vs. TERT                                                  | -1.23         | -1.443 to -1  | Yes          | ****          |            |
| Control vs. TERT + MYC                                            | -1.907        | -2.119 to -1  | Yes          | ****          |            |
| Control vs. TERT + MYC MUT                                        | -0.01833      | -0.2309 to 0  | No           | ns            |            |
| MYC vs. MYC MUT                                                   | 1.01          | 0.7974 to 1   | Yes          | ****          |            |
| MYC vs. TERT                                                      | -0.4033       | -0.6159 to -  | Yes          | ****          |            |
| MYC vs. TERT + MYC                                                | -1.08         | -1.293 to -0  | Yes          | ****          |            |
| MYC vs. TERT + MYC MUT                                            | 0.8083        | 0.5958 to 1   | Yes          | ****          |            |
| MYC MUT vs. TERT                                                  | -1.413        | -1.626 to -1  | Yes          | ****          |            |
| MYC MUT vs. TERT + MYC                                            | -2.09         | -2.303 to -1  | Yes          | ****          |            |
| MYC MUT vs. TERT + MYC MUT                                        | -0.2017       | -0.4142 to 0  | No           | ns            |            |
| TERT vs. TERT + MYC                                               | -0.6767       | -0.8892 to -  | Yes          | ****          |            |
| TERT vs. TERT + MYC MUT                                           | 1.212         | 0.9991 to 1   | Yes          | ****          |            |
| TERT + MYC vs. TERT + MYC MUT                                     | 1.888         | 1.676 to 2.1  | Yes          | ****          |            |
| PKM2                                                              |               |               |              |               |            |
| ANOVA summary                                                     |               |               |              |               |            |
| F                                                                 | 78.16         |               |              |               |            |
| P value                                                           | < 0.0001      |               |              |               |            |
| P value summary                                                   | ****          |               |              |               |            |
| Are differences among means statistically significant? (P < 0.05) | Yes           |               |              |               |            |
| R square                                                          | 0.9287        |               |              |               |            |
| Brown-Forsythe test                                               |               |               |              |               |            |
| F (DFn, DFd)                                                      | 2.449 (5, 30) |               |              |               |            |
| P value                                                           | 0.0564        |               |              |               |            |
| P value summary                                                   | ns            |               |              |               |            |
| Significantly different standard deviations? (P < 0.05)           | No            |               |              |               |            |
| Bartlett's test                                                   |               |               |              |               |            |
| Bartlett's statistic (corrected)                                  | 19.57         |               |              |               |            |
| P value                                                           | 0.0015        |               |              |               |            |

|                                                                   |               |                    |              |                   |            |
|-------------------------------------------------------------------|---------------|--------------------|--------------|-------------------|------------|
| P value summary                                                   | **            |                    |              |                   |            |
| Significantly different standard deviations? (P < 0.05)           | Yes           |                    |              |                   |            |
| ANOVA table                                                       | SS            | DF                 | MS           | F (DFn, DF)       | P value    |
| Treatment (between columns)                                       | 11.11         | 5                  | 2.221        | F (5, 30) = 17.11 | P < 0.0001 |
| Residual (within columns)                                         | 0.8526        | 30                 | 0.02842      |                   |            |
| Total                                                             | 11.96         | 35                 |              |                   |            |
| Data summary                                                      |               |                    |              |                   |            |
| Number of treatments (columns)                                    | 6             |                    |              |                   |            |
| Number of values (total)                                          | 36            |                    |              |                   |            |
| Number of families                                                | 1             |                    |              |                   |            |
| Number of comparisons per family                                  | 15            |                    |              |                   |            |
| Alpha                                                             | 0.05          |                    |              |                   |            |
| Tukey's multiple comparisons test                                 | Mean Diff.    | 95% CI of d        | Significant? | Summary           |            |
| Control vs. MYC                                                   | -0.7333       | -1.029 to -0.437   | Yes          | ****              |            |
| Control vs. MYC MUT                                               | 0.2533        | -0.04271 to 0.5493 | No           | ns                |            |
| Control vs. TERT                                                  | -0.8817       | -1.178 to -0.585   | Yes          | ****              |            |
| Control vs. TERT + MYC                                            | -1.1          | -1.396 to -0.804   | Yes          | ****              |            |
| Control vs. TERT + MYC MUT                                        | 0.2617        | -0.03438 to 0.5574 | No           | ns                |            |
| MYC vs. MYC MUT                                                   | 0.9867        | 0.6906 to 1.2828   | Yes          | ****              |            |
| MYC vs. TERT                                                      | -0.1483       | -0.4444 to 0.1478  | No           | ns                |            |
| MYC vs. TERT + MYC                                                | -0.3667       | -0.6627 to -0.0707 | Yes          | **                |            |
| MYC vs. TERT + MYC MUT                                            | 0.995         | 0.699 to 1.291     | Yes          | ****              |            |
| MYC MUT vs. TERT                                                  | -1.135        | -1.431 to -0.839   | Yes          | ****              |            |
| MYC MUT vs. TERT + MYC                                            | -1.353        | -1.649 to -1.057   | Yes          | ****              |            |
| MYC MUT vs. TERT + MYC MUT                                        | 0.008333      | -0.2877 to 0.271   | No           | ns                |            |
| TERT vs. TERT + MYC                                               | -0.2183       | -0.5144 to 0.0778  | No           | ns                |            |
| TERT vs. TERT + MYC MUT                                           | 1.143         | 0.8473 to 1.4387   | Yes          | ****              |            |
| TERT + MYC vs. TERT + MYC MUT                                     | 1.362         | 1.066 to 1.658     | Yes          | ****              |            |
|                                                                   |               |                    |              |                   |            |
|                                                                   |               |                    |              |                   |            |
| GAPDH                                                             |               |                    |              |                   |            |
| ANOVA summary                                                     |               |                    |              |                   |            |
| F                                                                 | 149.7         |                    |              |                   |            |
| P value                                                           | < 0.0001      |                    |              |                   |            |
| P value summary                                                   | ****          |                    |              |                   |            |
| Are differences among means statistically significant? (P < 0.05) | Yes           |                    |              |                   |            |
| R square                                                          | 0.9615        |                    |              |                   |            |
| Brown-Forsythe test                                               |               |                    |              |                   |            |
| F (DFn, DFd)                                                      | 6.280 (5, 30) |                    |              |                   |            |
| P value                                                           | 0.0004        |                    |              |                   |            |
| P value summary                                                   | ***           |                    |              |                   |            |
| Significantly different standard deviations? (P < 0.05)           | Yes           |                    |              |                   |            |
| Bartlett's test                                                   |               |                    |              |                   |            |
| Bartlett's statistic (corrected)                                  | 15.71         |                    |              |                   |            |
| P value                                                           | 0.0077        |                    |              |                   |            |
| P value summary                                                   | **            |                    |              |                   |            |
| Significantly different standard deviations? (P < 0.05)           | Yes           |                    |              |                   |            |
| ANOVA table                                                       | SS            | DF                 | MS           | F (DFn, DF)       | P value    |
| Treatment (between columns)                                       | 8.58          | 5                  | 1.716        | F (5, 30) = 17.11 | P < 0.0001 |
| Residual (within columns)                                         | 0.344         | 30                 | 0.01147      |                   |            |
| Total                                                             | 8.924         | 35                 |              |                   |            |
| Data summary                                                      |               |                    |              |                   |            |
| Number of treatments (columns)                                    | 6             |                    |              |                   |            |
| Number of values (total)                                          | 36            |                    |              |                   |            |
| Number of families                                                | 1             |                    |              |                   |            |
| Number of comparisons per family                                  | 15            |                    |              |                   |            |
| Alpha                                                             | 0.05          |                    |              |                   |            |
| Tukey's multiple comparisons test                                 | Mean Diff.    | 95% CI of d        | Significant? | Summary           |            |
| Control vs. MYC                                                   | -0.9083       | -1.096 to -0.72    | Yes          | ****              |            |

|                               |         |              |     |      |  |
|-------------------------------|---------|--------------|-----|------|--|
| Control vs. MYC MUT           | -0.215  | -0.4030 to - | Yes | *    |  |
| Control vs. TERT              | -1.112  | -1.300 to -0 | Yes | **** |  |
| Control vs. TERT + MYC        | -1.345  | -1.533 to -1 | Yes | **** |  |
| Control vs. TERT + MYC MUT    | -0.4117 | -0.5997 to - | Yes | **** |  |
| MYC vs. MYC MUT               | 0.6933  | 0.5053 to 0  | Yes | **** |  |
| MYC vs. TERT                  | -0.2033 | -0.3914 to - | Yes | *    |  |
| MYC vs. TERT + MYC            | -0.4367 | -0.6247 to - | Yes | **** |  |
| MYC vs. TERT + MYC MUT        | 0.4967  | 0.3086 to 0  | Yes | **** |  |
| MYC MUT vs. TERT              | -0.8967 | -1.085 to -0 | Yes | **** |  |
| MYC MUT vs. TERT + MYC        | -1.13   | -1.318 to -0 | Yes | **** |  |
| MYC MUT vs. TERT + MYC MUT    | -0.1967 | -0.3847 to - | Yes | *    |  |
| TERT vs. TERT + MYC           | -0.2333 | -0.4214 to - | Yes | **   |  |
| TERT vs. TERT + MYC MUT       | 0.7     | 0.5120 to 0  | Yes | **** |  |
| TERT + MYC vs. TERT + MYC MUT | 0.9333  | 0.7453 to 1  | Yes | **** |  |



| Statistics for Figure S6C                                         |               |                    |              |                   |            |
|-------------------------------------------------------------------|---------------|--------------------|--------------|-------------------|------------|
| Cyclin D1                                                         |               |                    |              |                   |            |
| ANOVA summary                                                     |               |                    |              |                   |            |
| F                                                                 | 70.47         |                    |              |                   |            |
| P value                                                           | < 0.0001      |                    |              |                   |            |
| P value summary                                                   | ****          |                    |              |                   |            |
| Are differences among means statistically significant? (P < 0.05) | Yes           |                    |              |                   |            |
| R square                                                          | 0.9514        |                    |              |                   |            |
| Brown-Forsythe test                                               |               |                    |              |                   |            |
| F (DFn, DFd)                                                      | 1.811 (5, 18) |                    |              |                   |            |
| P value                                                           | 0.1614        |                    |              |                   |            |
| P value summary                                                   | ns            |                    |              |                   |            |
| Significantly different standard deviations? (P < 0.05)           | No            |                    |              |                   |            |
| Bartlett's test                                                   |               |                    |              |                   |            |
| Bartlett's statistic (corrected)                                  | 11.09         |                    |              |                   |            |
| P value                                                           | 0.0495        |                    |              |                   |            |
| P value summary                                                   | *             |                    |              |                   |            |
| Significantly different standard deviations? (P < 0.05)           | Yes           |                    |              |                   |            |
| ANOVA table                                                       |               |                    |              |                   |            |
|                                                                   | SS            | DF                 | MS           | F (DFn, DFd)      | P value    |
| Treatment (between columns)                                       | 9.22          | 5                  | 1.844        | F (5, 18) = 70.47 | P < 0.0001 |
| Residual (within columns)                                         | 0.471         | 18                 | 0.02617      |                   |            |
| Total                                                             | 9.691         |                    |              |                   |            |
| Data summary                                                      |               |                    |              |                   |            |
| Number of treatments (columns)                                    | 6             |                    |              |                   |            |
| Number of values (total)                                          | 24            |                    |              |                   |            |
| Number of families                                                | 1             |                    |              |                   |            |
| Number of comparisons per family                                  | 15            |                    |              |                   |            |
| Alpha                                                             | 0.05          |                    |              |                   |            |
| Tukey's multiple comparisons test                                 |               |                    |              |                   |            |
|                                                                   | Mean Diff.    | 95% CI of diff.    | Significant? | Summary           |            |
| shControl + Vector vs. shControl + MYC                            | -0.3138       | -0.6773 to 0.05    | No           | ns                |            |
| shControl + Vector vs. shControl + MYC T58A                       | -0.7128       | -1.076 to -0.35    | Yes          | ****              |            |
| shControl + Vector vs. shTERT + Vector                            | 0.4102        | 0.04670 to 0.7737  | Yes          | *                 |            |
| shControl + Vector vs. shTERT + MYC                               | -0.2051       | -0.5686 to 0.1584  | No           | ns                |            |
| shControl + Vector vs. shTERT + MYC T58A                          | -1.56         | -1.923 to -1.197   | Yes          | ****              |            |
| shControl + MYC vs. shControl + MYC T58A                          | -0.399        | -0.7625 to -0.0355 | Yes          | *                 |            |
| shControl + MYC vs. shTERT + Vector                               | 0.724         | 0.3605 to 1.0875   | Yes          | ****              |            |
| shControl + MYC vs. shTERT + MYC                                  | 0.1087        | -0.2548 to 0.4734  | No           | ns                |            |
| shControl + MYC vs. shTERT + MYC T58A                             | -1.246        | -1.610 to -0.882   | Yes          | ****              |            |
| shControl + MYC T58A vs. shTERT + Vector                          | 1.123         | 0.7595 to 1.4865   | Yes          | ****              |            |
| shControl + MYC T58A vs. shTERT + MYC                             | 0.5077        | 0.1442 to 0.8712   | Yes          | **                |            |
| shControl + MYC T58A vs. shTERT + MYC T58A                        | -0.8471       | -1.211 to -0.483   | Yes          | ****              |            |
| shTERT + Vector vs. shTERT + MYC                                  | -0.6153       | -0.9788 to -0.2518 | Yes          | ***               |            |
| shTERT + Vector vs. shTERT + MYC T58A                             | -1.97         | -2.334 to -1.606   | Yes          | ****              |            |
| shTERT + MYC vs. shTERT + MYC T58A                                | -1.355        | -1.718 to -0.992   | Yes          | ****              |            |
| eif2A                                                             |               |                    |              |                   |            |
| ANOVA summary                                                     |               |                    |              |                   |            |
| F                                                                 | 40.05         |                    |              |                   |            |
| P value                                                           | < 0.0001      |                    |              |                   |            |
| P value summary                                                   | ****          |                    |              |                   |            |
| Are differences among means statistically significant? (P < 0.05) | Yes           |                    |              |                   |            |
| R square                                                          | 0.9175        |                    |              |                   |            |
| Brown-Forsythe test                                               |               |                    |              |                   |            |
| F (DFn, DFd)                                                      | 2.825 (5, 18) |                    |              |                   |            |
| P value                                                           | 0.047         |                    |              |                   |            |
| P value summary                                                   | *             |                    |              |                   |            |
| Significantly different standard deviations? (P < 0.05)           | Yes           |                    |              |                   |            |
| Bartlett's test                                                   |               |                    |              |                   |            |
| Bartlett's statistic (corrected)                                  | 15.12         |                    |              |                   |            |
| P value                                                           | 0.0099        |                    |              |                   |            |
| P value summary                                                   | **            |                    |              |                   |            |
| Significantly different standard deviations? (P < 0.05)           | Yes           |                    |              |                   |            |

|                                                           |               |               |              |               |            |
|-----------------------------------------------------------|---------------|---------------|--------------|---------------|------------|
| ANOVA table                                               | SS            | DF            | MS           | F (DFn, DFd)  | P value    |
| Treatment (between columns)                               | 8.387         | 5             | 1.677        | F (5, 18) = 4 | P < 0.0001 |
| Residual (within columns)                                 | 0.7539        | 18            | 0.04188      |               |            |
| Total                                                     | 9.141         | 23            |              |               |            |
| Data summary                                              |               |               |              |               |            |
| Number of treatments (columns)                            | 6             |               |              |               |            |
| Number of values (total)                                  | 24            |               |              |               |            |
| Number of families                                        | 1             |               |              |               |            |
| Number of comparisons per family                          | 15            |               |              |               |            |
| Alpha                                                     | 0.05          |               |              |               |            |
| Tukey's multiple comparisons test                         | Mean Diff.    | 95% CI of d   | Significant? | Summary       |            |
| shControl + Vector vs. shControl + MYC                    | -0.1819       | -0.6418 to 0  | No           | ns            |            |
| shControl + Vector vs. shControl + MYC T58A               | -1.119        | -1.579 to -0  | Yes          | ****          |            |
| shControl + Vector vs. shTERT + Vector                    | 0.4438        | -0.01605 to 0 | No           | ns            |            |
| shControl + Vector vs. shTERT + MYC                       | 0.1069        | -0.3530 to 0  | No           | ns            |            |
| shControl + Vector vs. shTERT + MYC T58A                  | -1.077        | -1.537 to -0  | Yes          | ****          |            |
| shControl + MYC vs. shControl + MYC T58A                  | -0.9372       | -1.397 to -0  | Yes          | ****          |            |
| shControl + MYC vs. shTERT + Vector                       | 0.6258        | 0.1659 to 1   | Yes          | **            |            |
| shControl + MYC vs. shTERT + MYC                          | 0.2888        | -0.1711 to 0  | No           | ns            |            |
| shControl + MYC vs. shTERT + MYC T58A                     | -0.8947       | -1.355 to -0  | Yes          | ****          |            |
| shControl + MYC T58A vs. shTERT + Vector                  | 1.563         | 1.103 to 2.0  | Yes          | ****          |            |
| shControl + MYC T58A vs. shTERT + MYC                     | 1.226         | 0.7661 to 1   | Yes          | ****          |            |
| shControl + MYC T58A vs. shTERT + MYC T58A                | 0.0425        | -0.4174 to 0  | No           | ns            |            |
| shTERT + Vector vs. shTERT + MYC                          | -0.337        | -0.7969 to 0  | No           | ns            |            |
| shTERT + Vector vs. shTERT + MYC T58A                     | -1.52         | -1.980 to -1  | Yes          | ****          |            |
| shTERT + MYC vs. shTERT + MYC T58A                        | -1.184        | -1.643 to -0  | Yes          | ****          |            |
| NCL                                                       |               |               |              |               |            |
| ANOVA summary                                             |               |               |              |               |            |
| F                                                         | 35.89         |               |              |               |            |
| P value                                                   | < 0.0001      |               |              |               |            |
| P value summary                                           | ****          |               |              |               |            |
| Are differences among means statistically significant? (P | Yes           |               |              |               |            |
| R square                                                  | 0.9088        |               |              |               |            |
| Brown-Forsythe test                                       |               |               |              |               |            |
| F (DFn, DFd)                                              | 3.726 (5, 18) |               |              |               |            |
| P value                                                   | 0.0172        |               |              |               |            |
| P value summary                                           | *             |               |              |               |            |
| Significantly different standard deviations? (P < 0.05)   | Yes           |               |              |               |            |
| Bartlett's test                                           |               |               |              |               |            |
| Bartlett's statistic (corrected)                          | 19.97         |               |              |               |            |
| P value                                                   | 0.0013        |               |              |               |            |
| P value summary                                           | **            |               |              |               |            |
| Significantly different standard deviations? (P < 0.05)   | Yes           |               |              |               |            |
| ANOVA table                                               | SS            | DF            | MS           | F (DFn, DFd)  | P value    |
| Treatment (between columns)                               | 10.75         | 5             | 2.15         | F (5, 18) = 3 | P < 0.0001 |
| Residual (within columns)                                 | 1.078         | 18            | 0.05989      |               |            |
| Total                                                     | 11.83         | 23            |              |               |            |
| Data summary                                              |               |               |              |               |            |
| Number of treatments (columns)                            | 6             |               |              |               |            |
| Number of values (total)                                  | 24            |               |              |               |            |
| Number of families                                        | 1             |               |              |               |            |
| Number of comparisons per family                          | 15            |               |              |               |            |
| Alpha                                                     | 0.05          |               |              |               |            |
| Tukey's multiple comparisons test                         | Mean Diff.    | 95% CI of d   | Significant? | Summary       |            |
| shControl + Vector vs. shControl + MYC                    | -0.4684       | -1.018 to 0   | No           | ns            |            |
| shControl + Vector vs. shControl + MYC T58A               | -1.246        | -1.795 to -0  | Yes          | ****          |            |
| shControl + Vector vs. shTERT + Vector                    | 0.4899        | -0.06000 to 0 | No           | ns            |            |
| shControl + Vector vs. shTERT + MYC                       | -0.06165      | -0.6116 to 0  | No           | ns            |            |
| shControl + Vector vs. shTERT + MYC T58A                  | -1.354        | -1.904 to -0  | Yes          | ****          |            |
| shControl + MYC vs. shControl + MYC T58A                  | -0.7771       | -1.327 to -0  | Yes          | **            |            |

|                                            |         |              |     |      |  |  |
|--------------------------------------------|---------|--------------|-----|------|--|--|
| shControl + MYC vs. shTERT + Vector        | 0.9583  | 0.4084 to 1  | Yes | ***  |  |  |
| shControl + MYC vs. shTERT + MYC           | 0.4067  | -0.1432 to 0 | No  | ns   |  |  |
| shControl + MYC vs. shTERT + MYC T58A      | -0.8859 | -1.436 to -0 | Yes | ***  |  |  |
| shControl + MYC T58A vs. shTERT + Vector   | 1.735   | 1.186 to 2.2 | Yes | **** |  |  |
| shControl + MYC T58A vs. shTERT + MYC      | 1.184   | 0.6339 to 1  | Yes | **** |  |  |
| shControl + MYC T58A vs. shTERT + MYC T58A | -0.1087 | -0.6587 to 0 | No  | ns   |  |  |
| shTERT + Vector vs. shTERT + MYC           | -0.5516 | -1.102 to -0 | Yes | *    |  |  |
| shTERT + Vector vs. shTERT + MYC T58A      | -1.844  | -2.394 to -1 | Yes | **** |  |  |
| shTERT + MYC vs. shTERT + MYC T58A         | -1.293  | -1.843 to -0 | Yes | **** |  |  |
|                                            |         |              |     |      |  |  |

**Figure S1**

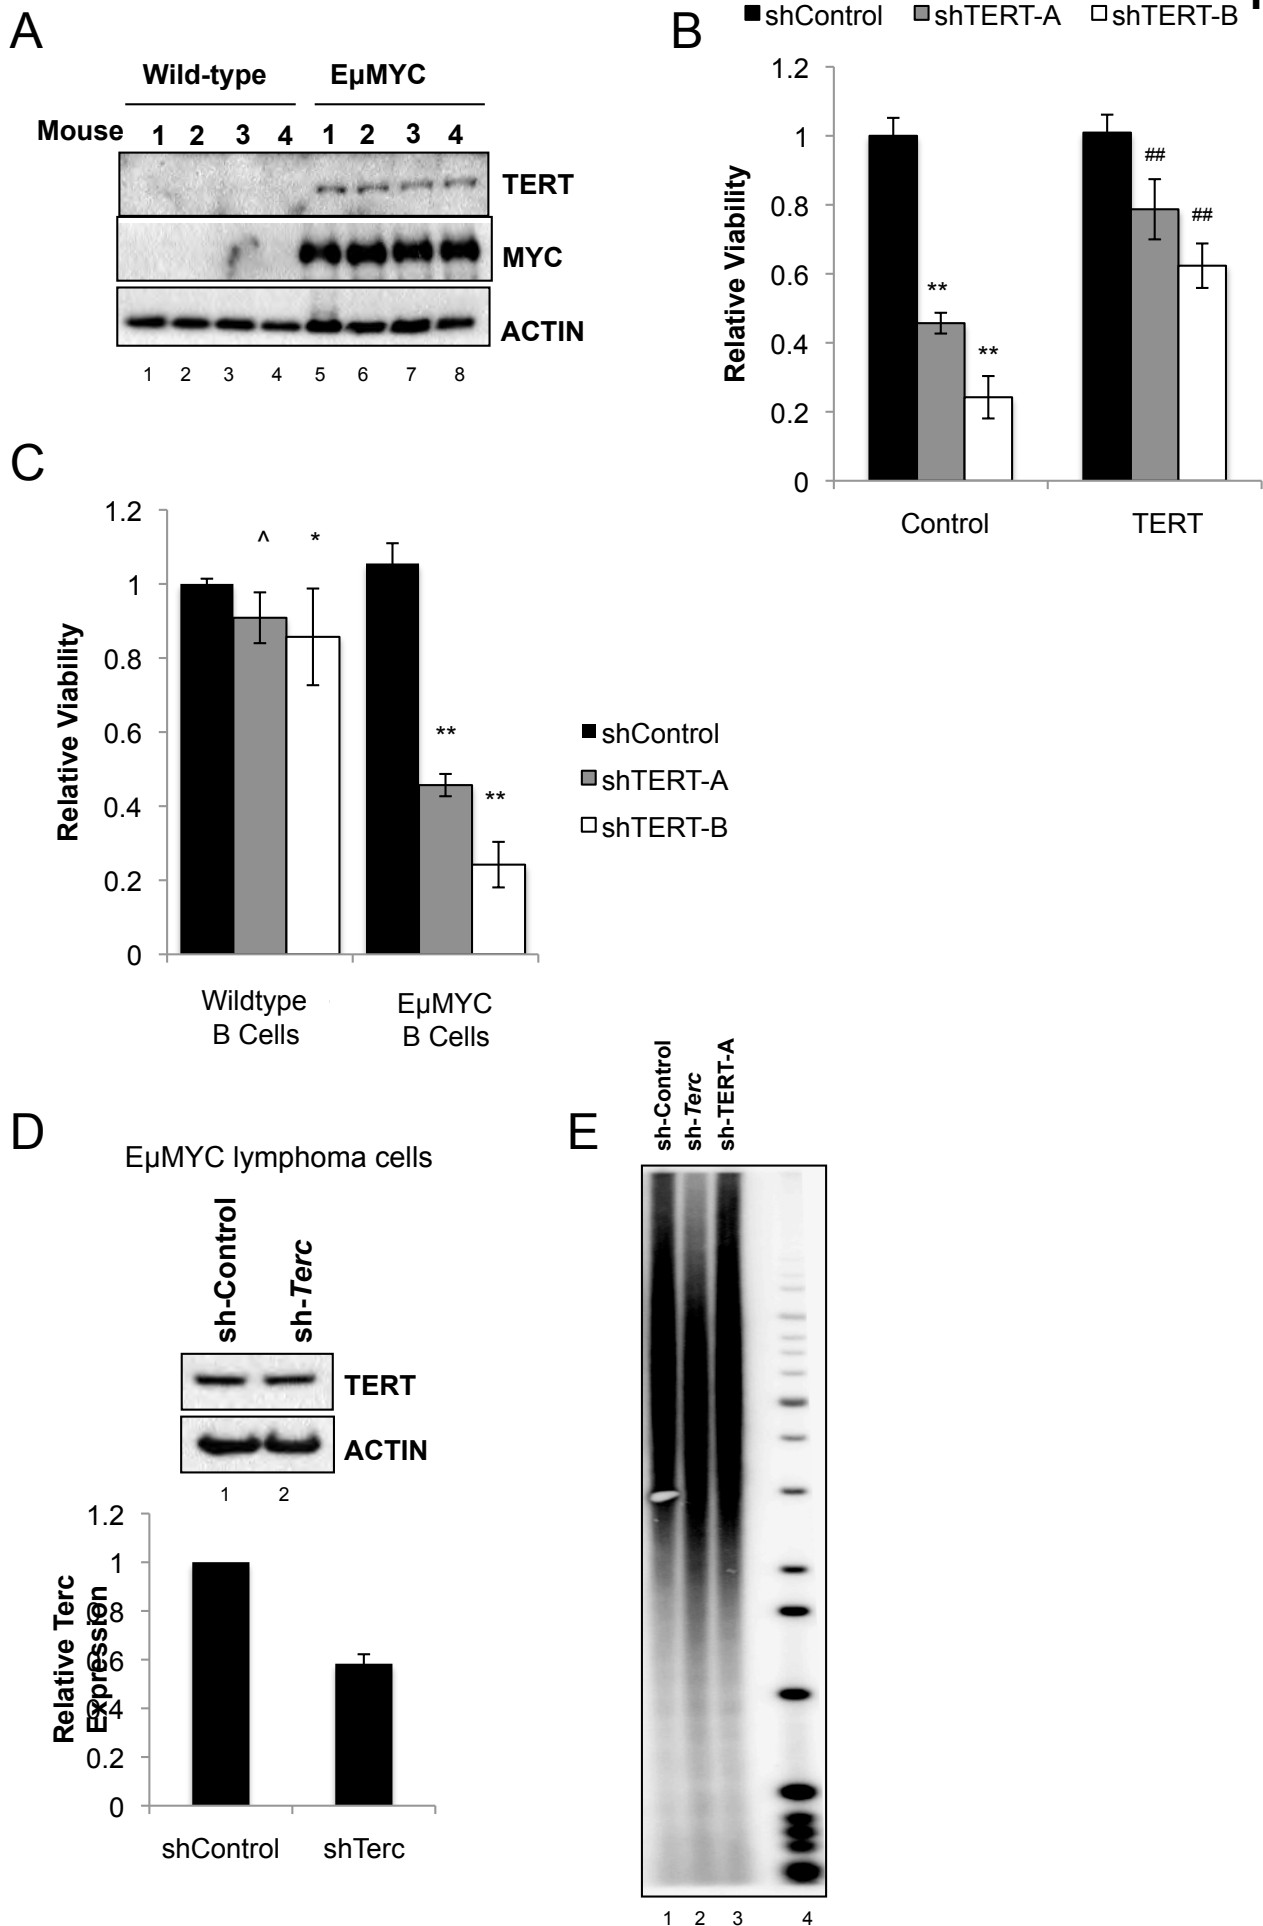

Figure S2

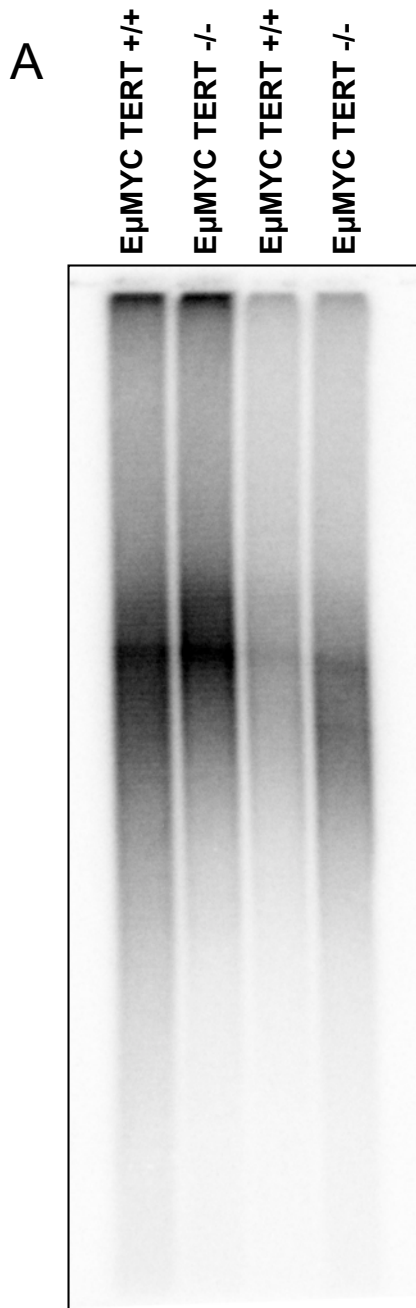

B

$E\mu$ MYC  
TERT +/+  
B cells

$E\mu$ MYC  
TERT -/-  
B cells

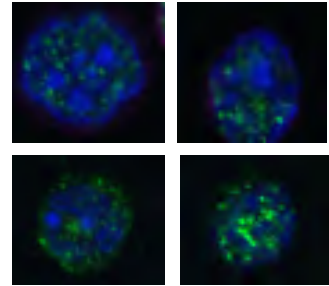

DAPI  
TRF2  
 $\gamma$ H2AX

**Figure S3**

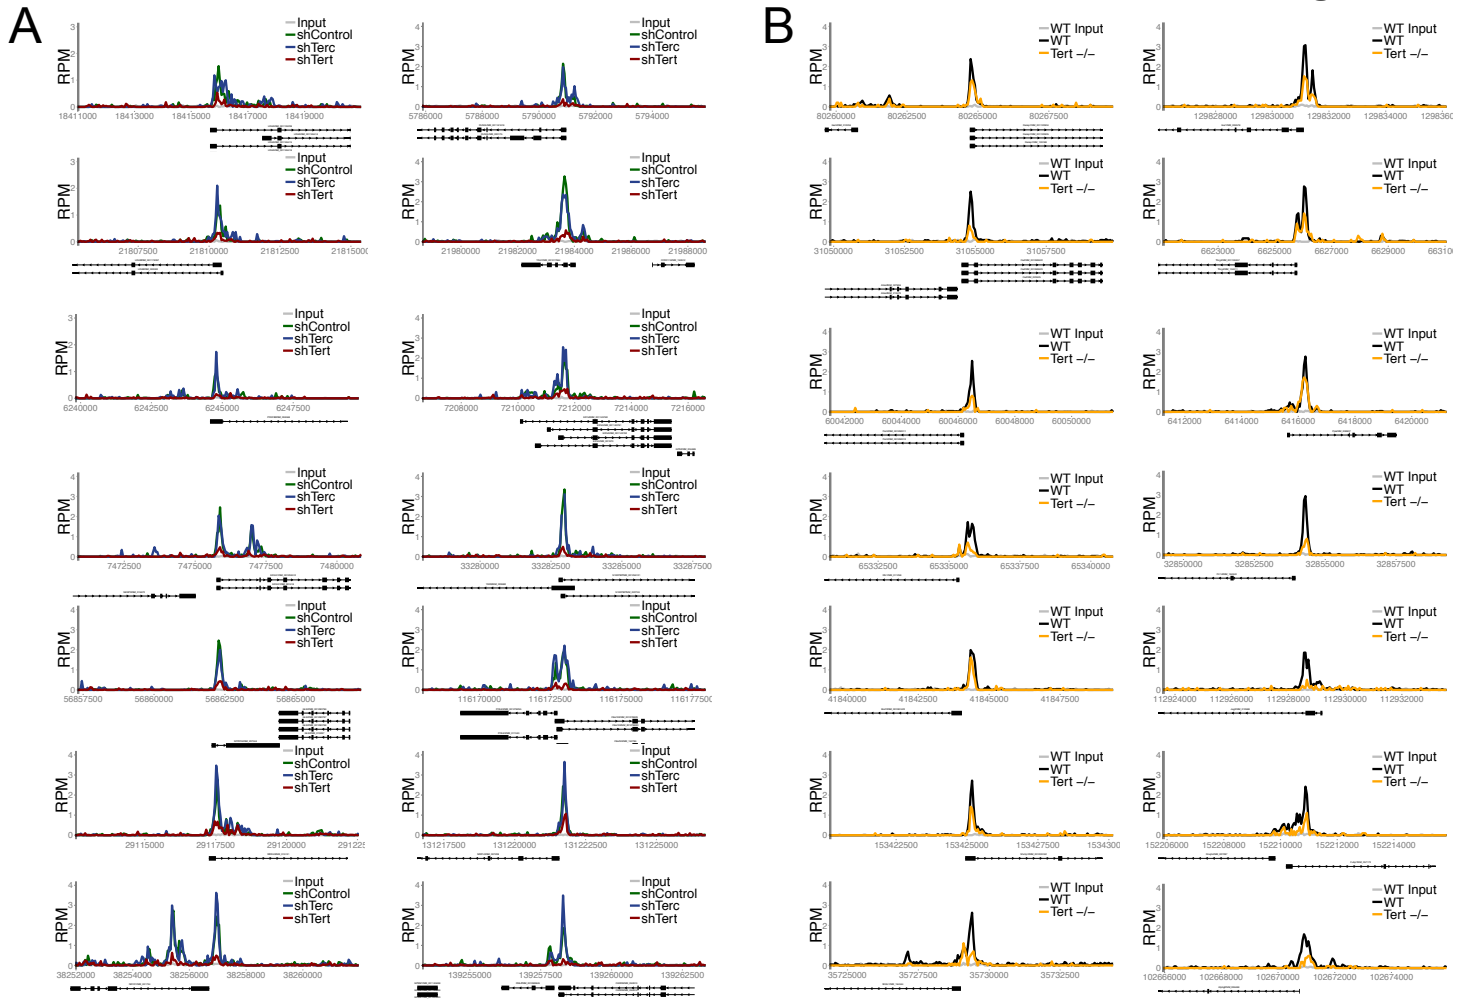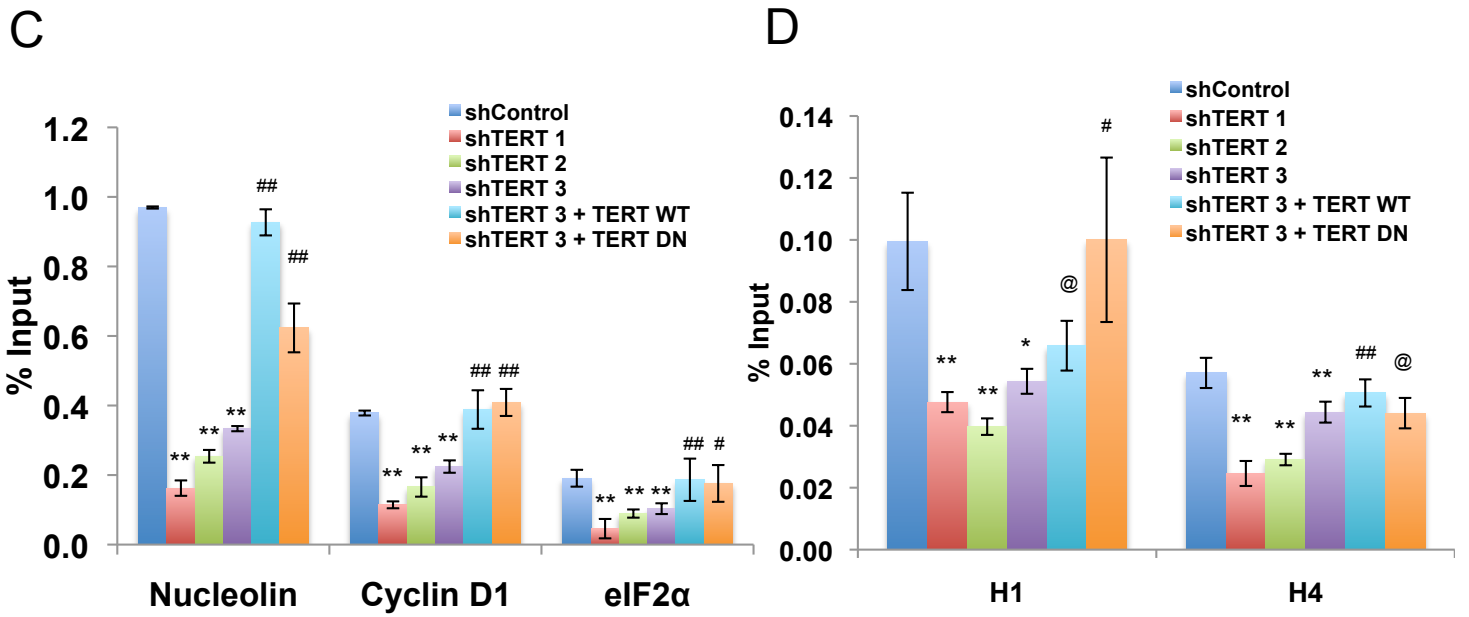

Figure S3

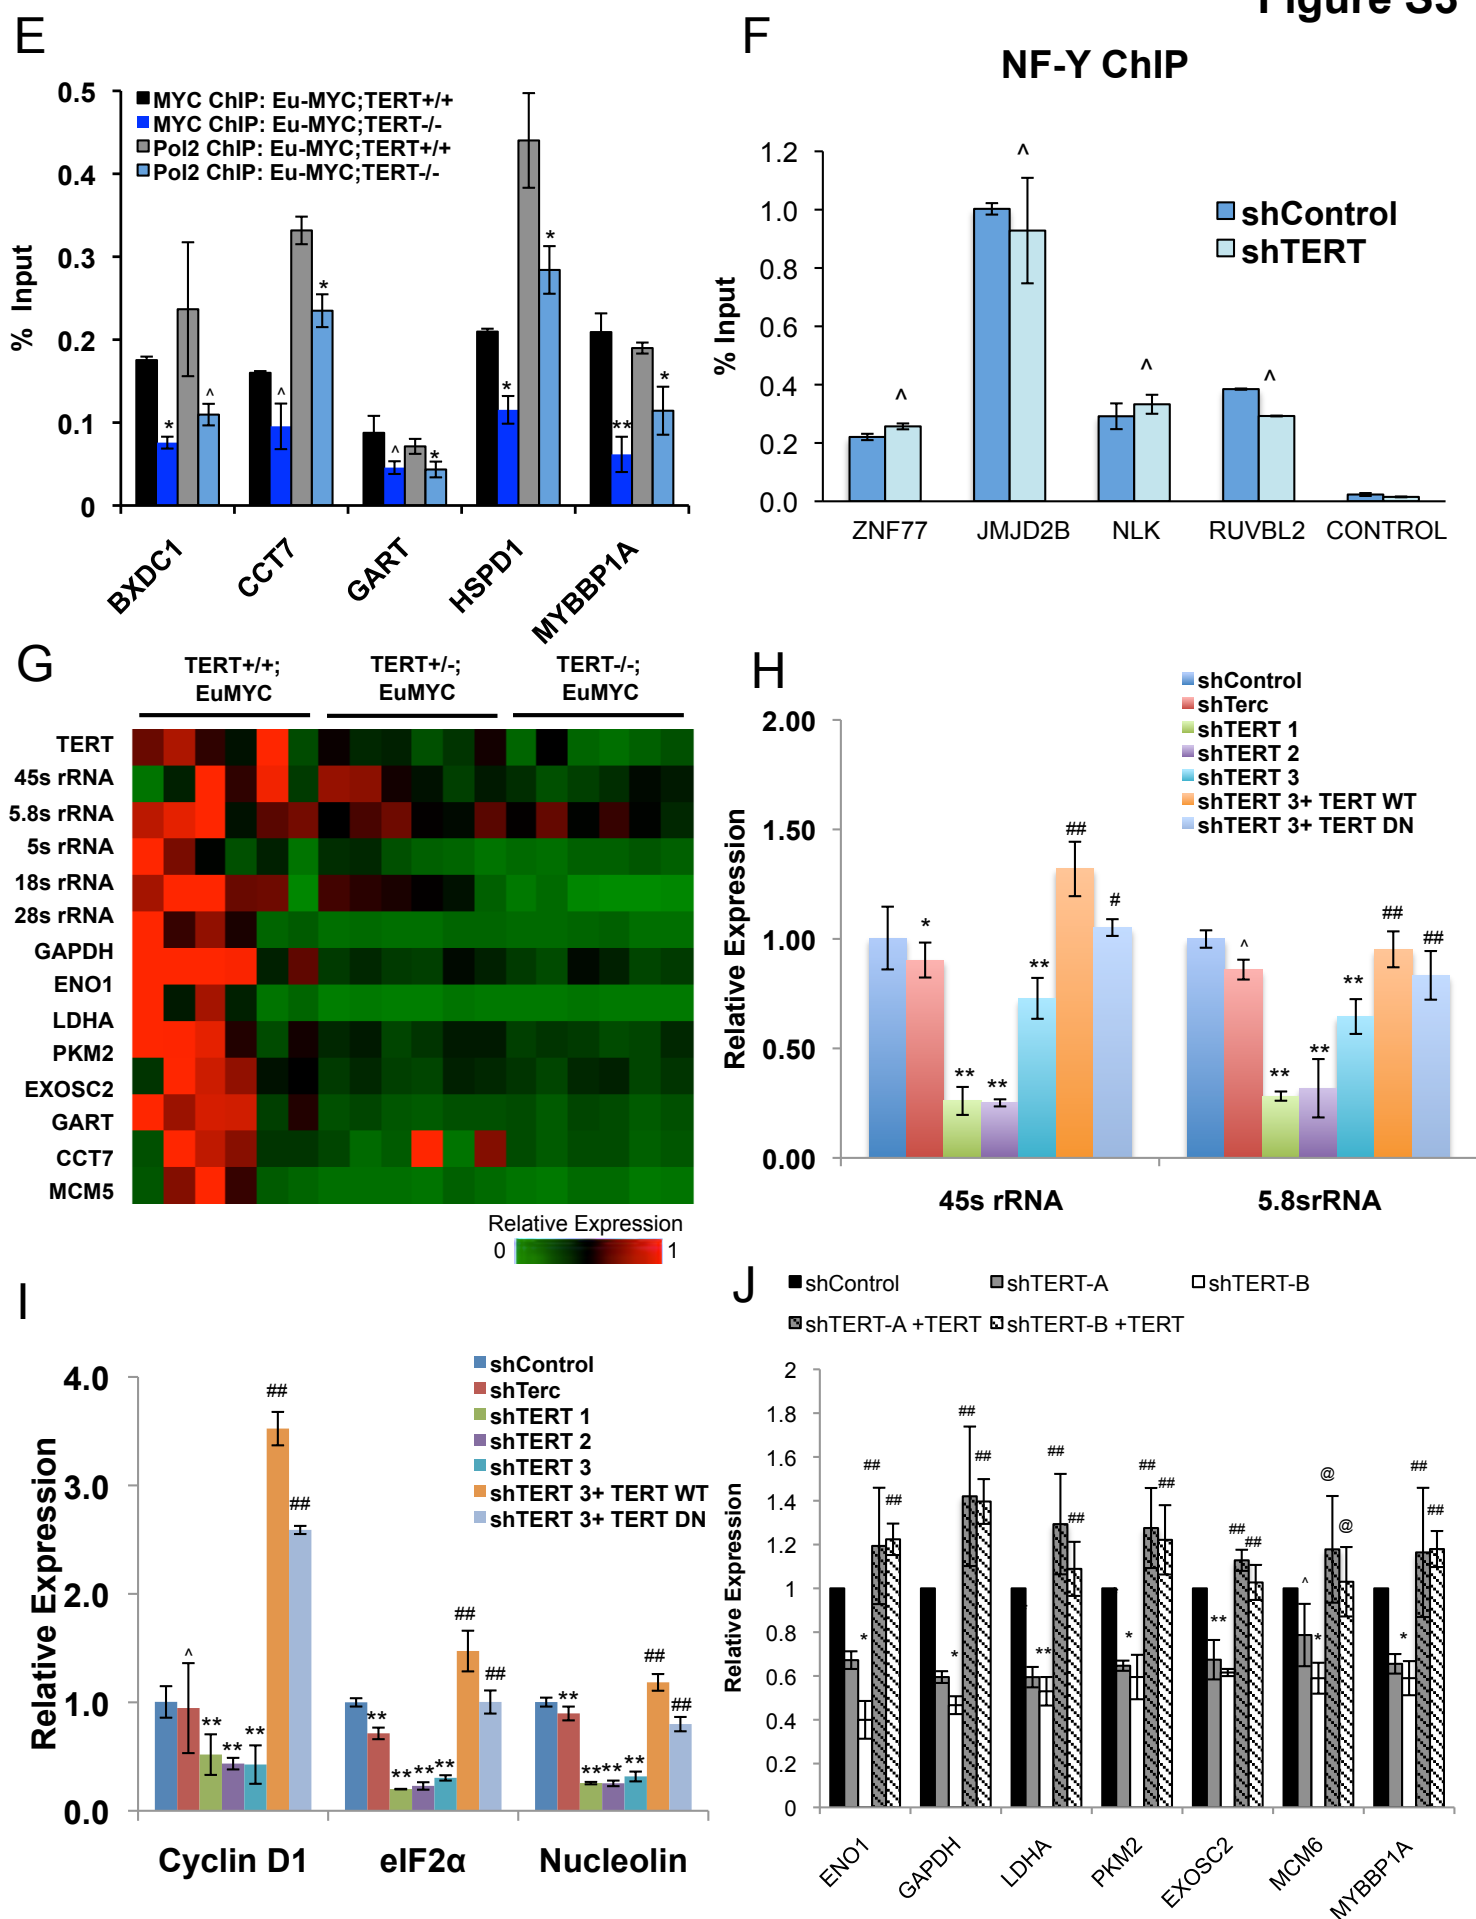

**Figure S4**

**A**

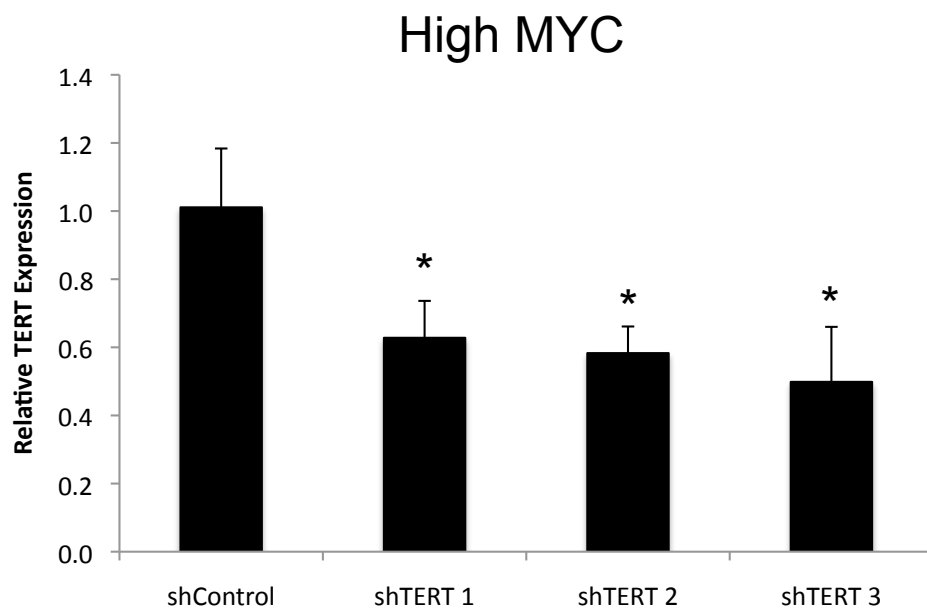

**B**

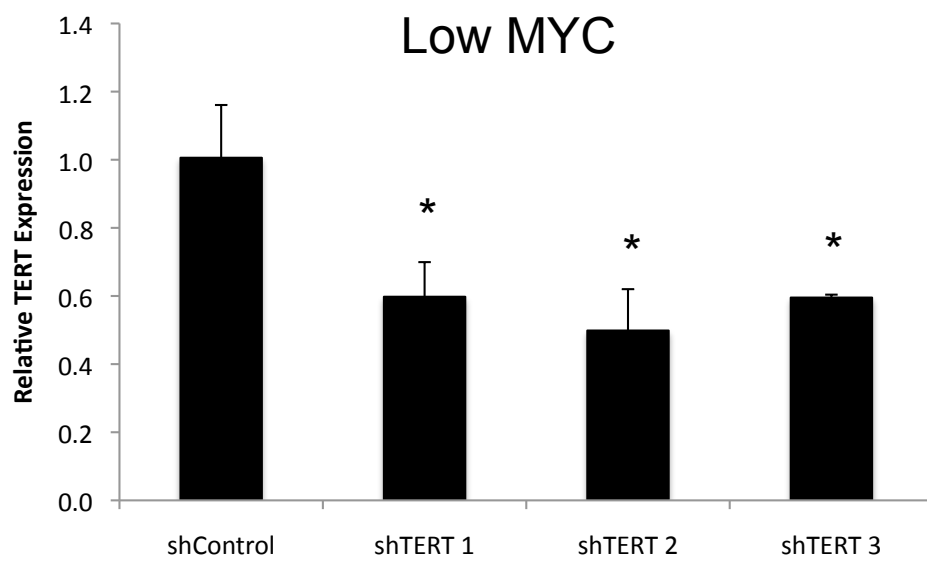



**Figure S5**

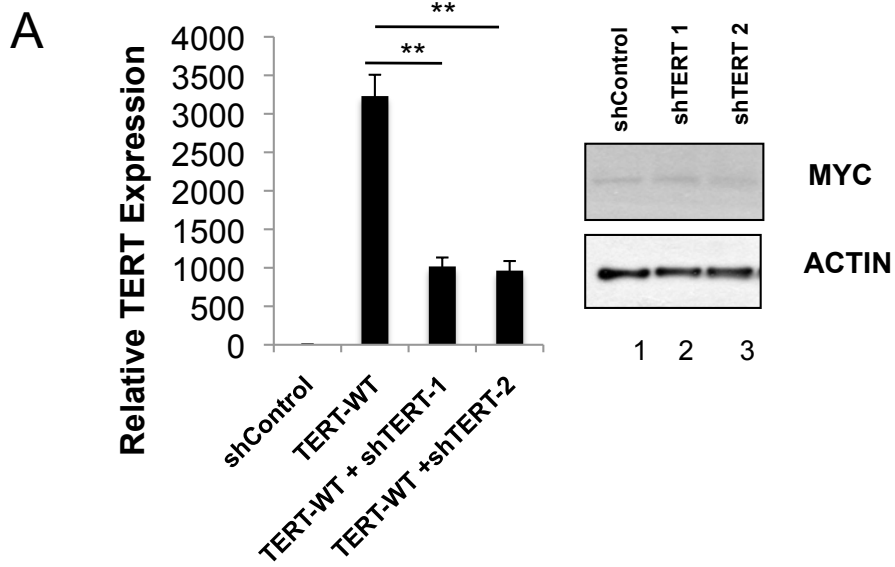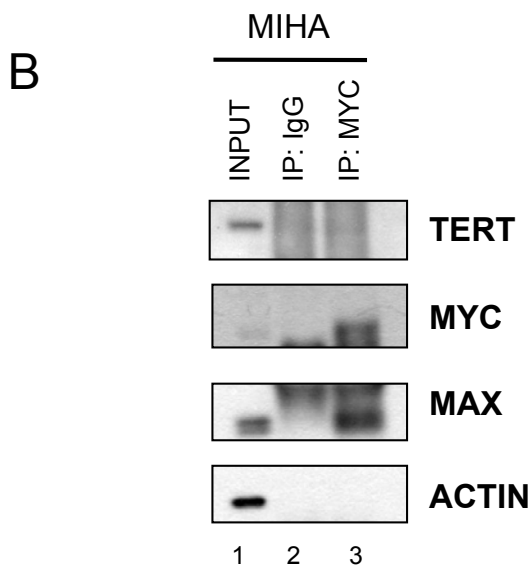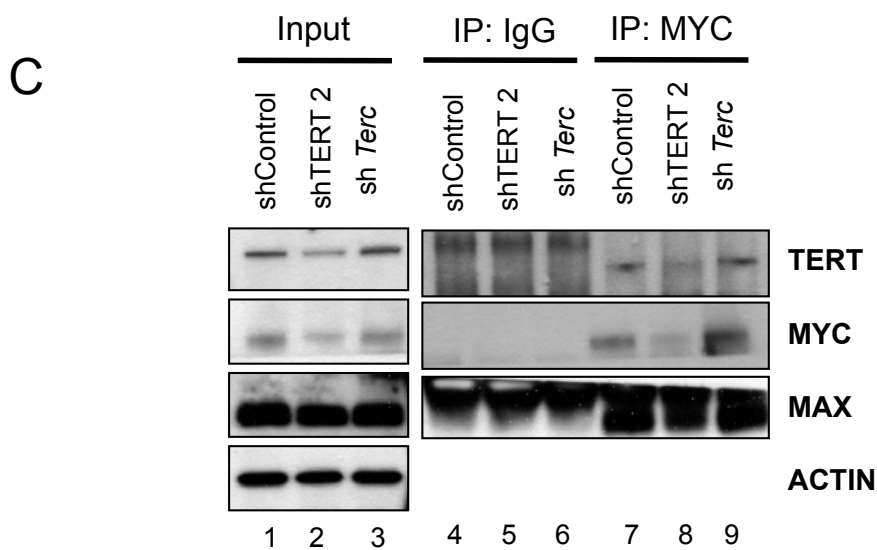

D

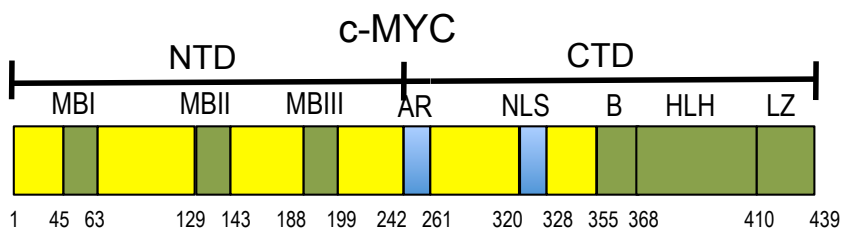

E

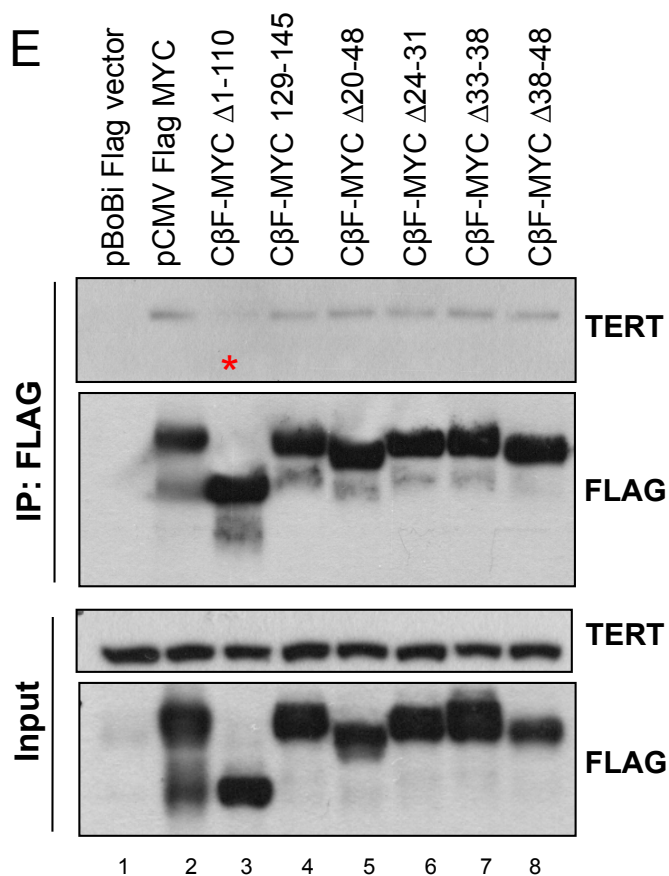

F

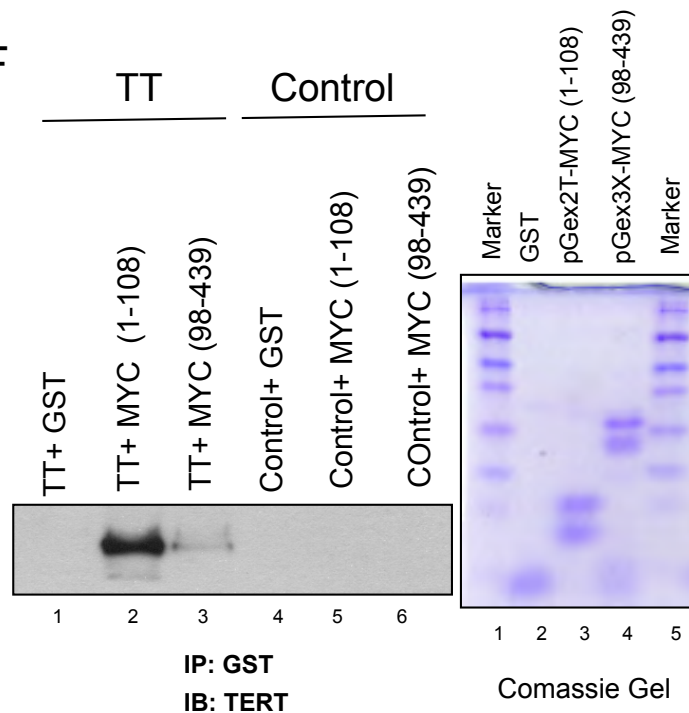

G

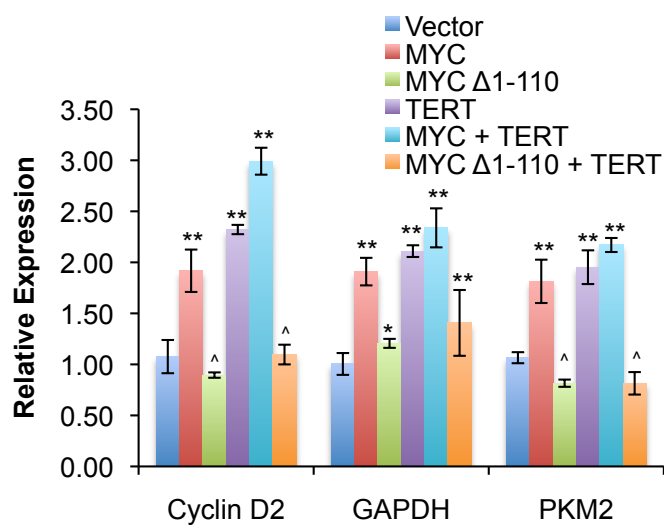

H

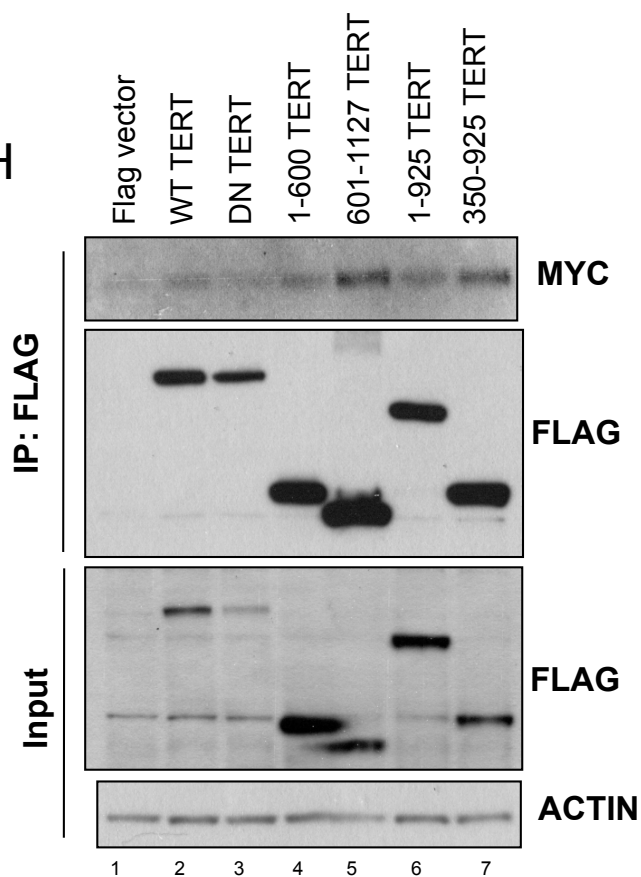

**Figure S6**

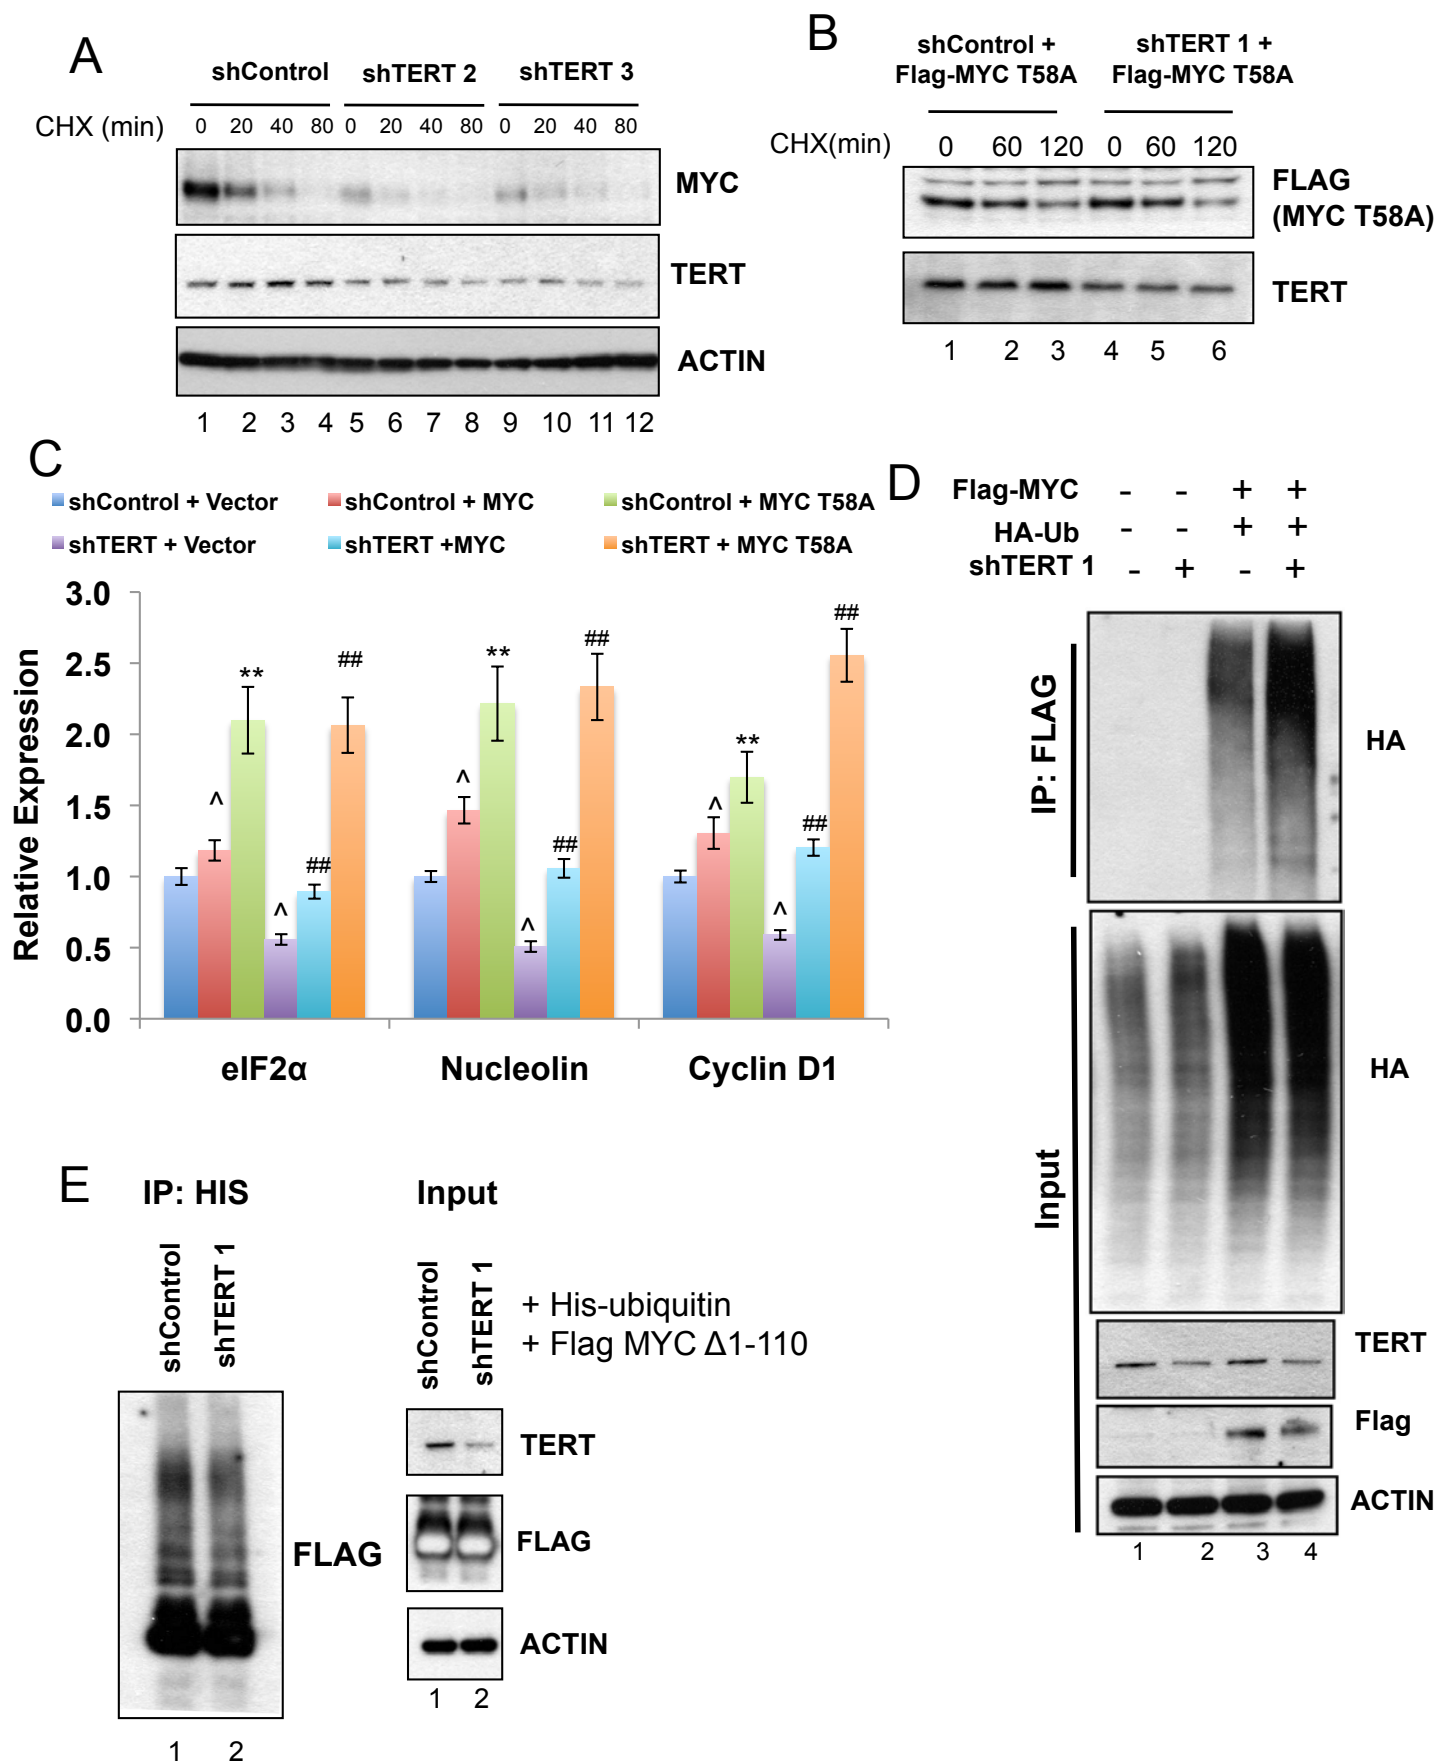

**Figure S7**

**A**

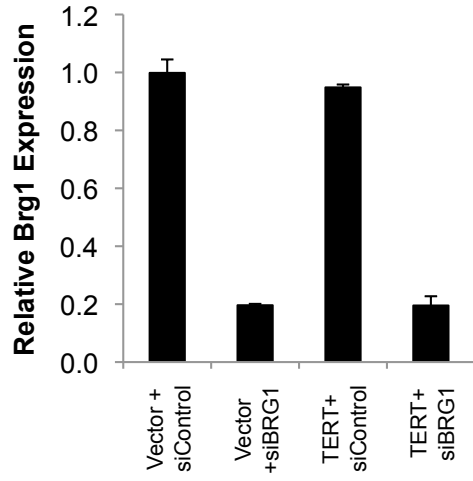

**B**

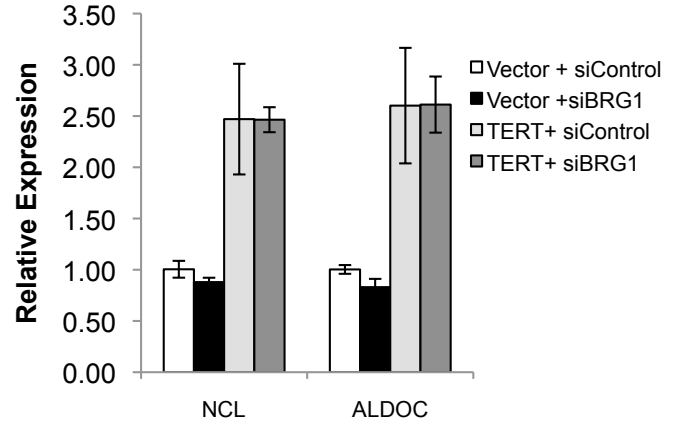

Supplement: JCI79134sd.pdf [file JCI79134sd.pdf]
